1 Genetic autonomy and low singlet oxygen yield support  
2 kleptoplast functionality in photosynthetic sea slugs

3 Vesa Havurinne<sup>1</sup> (vetahav@utu.fi), Maria Handrich<sup>2</sup> (maria.handrich@hhu.de), Mikko  
4 Antinluoma<sup>1</sup> (mikkoantinluoma@gmail.com), Sergey Khorobrykh<sup>1</sup>  
5 (sergey.khorobrykh@utu.fi), Sven B. Gould<sup>2</sup> (gould@hhu.de), Esa Tyystjärvi<sup>1</sup>  
6 (esatyy@utu.fi)

7 <sup>1</sup>*University of Turku, Department of Biochemistry / Molecular plant biology, Finland;*

8 <sup>2</sup>*Department of Biology, Heinrich-Heine-Universität, 40225 Düsseldorf, Germany*

9 Corresponding author: Esa Tyystjärvi (Tel. +358 50 4382766, email [esatyy@utu.fi](mailto:esatyy@utu.fi))

10

11 Date of submission: 02.02.2021

12 Number of tables: 2

13 Number of figures: 6

14 Supplementary data: 2 tables, 4 figures

15 Running title: Intrinsic traits of photosynthetic slug's plastid

16

17

18

19

20

21

22

23

24

## 25 Highlight

26 Isolated *Vaucheria litorea* plastids exhibit upregulation of *tufA* and *ftsH*, key plastid  
27 maintenance genes, and produce only little singlet oxygen. These factors likely contribute to  
28 plastid longevity in kleptoplastic slugs.

## 29 Abstract

30 *Elysia chlorotica* is a kleptoplastic sea slug that preys on *Vaucheria litorea*, stealing its plastids  
31 which then continue to photosynthesize for months inside the animal cells. We investigated the  
32 native properties of *V. litorea* plastids to understand how they withstand the rigors of  
33 photosynthesis in isolation. Transcription of specific genes in laboratory-isolated *V. litorea*  
34 plastids was monitored up to seven days. The involvement of plastid-encoded FtsH, a key  
35 plastid maintenance protease, in recovery from photoinhibition in *V. litorea* was estimated in  
36 cycloheximide-treated cells. *In vitro* comparison of *V. litorea* and spinach thylakoids was  
37 applied to investigate ROS formation in *V. litorea*. Isolating *V. litorea* plastids triggered  
38 upregulation of *ftsH* and translation elongation factor EF-Tu (*tufA*). Upregulation of FtsH was  
39 also evident in cycloheximide-treated cells during recovery from photoinhibition. Charge  
40 recombination in PSII of *V. litorea* was found to be fine-tuned to produce only small quantities  
41 of singlet oxygen ( $^1\text{O}_2$ ). Our results support the view that the genetic characteristics of the  
42 plastids themselves are crucial in creating a photosynthetic sea slug. The plastid's autonomous  
43 repair machinery is likely enhanced by low  $^1\text{O}_2$  production and by upregulation of FtsH in the  
44 plastids.

## 45 Keywords

46 Kleptoplasty, photoinhibition, photosynthetic sea slugs, PSII repair cycle, reactive oxygen  
47 species, singlet oxygen, *Vaucheria litorea*

## 48 Abbreviations

|    |                |                                              |
|----|----------------|----------------------------------------------|
| 49 | $^1\text{O}_2$ | singlet oxygen                               |
| 50 | CHI            | cycloheximide                                |
| 51 | DCBQ           | 2,6-dichloro-1,4-benzoquinone;               |
| 52 | DCMU           | 3-(3,4-dichlorophenyl)-1,1-dimethylurea      |
| 53 | DCPIP          | 2,6-dichlorophenolindophenol                 |
| 54 | $F_V/F_M$      | maximum quantum yield of PSII photochemistry |

|    |           |                                       |
|----|-----------|---------------------------------------|
| 55 | $k_{PI}$  | rate constant of PSII photoinhibition |
| 56 | MDA       | malondialdehyde                       |
| 57 | OEC       | oxygen evolving complex of PSII       |
| 58 | $P_{680}$ | reaction center Chl of PSII           |
| 59 | $P_{700}$ | reaction center Chl of PSI            |
| 60 | $P_M$     | maximum oxidation of $P_{700}$        |
| 61 | PPFD      | photosynthetic photon flux density    |
| 62 | PSI       | Photosystem I                         |
| 63 | PSII      | Photosystem II                        |
| 64 | ROS       | reactive oxygen species               |
| 65 | TEM       | transmission electron microscope      |
| 66 | $Tyr_D^+$ | oxidized tyrosine-D residue of PSII   |

## 67 Introduction

68 Functional kleptoplasty in photosynthetic sea slugs depends on two major components: the first  
69 is a slug capable of stealing plastids and retaining them functional within its cells, the second  
70 a plastid with a specific genetic repertoire (de Vries *et al.*, 2015). All species that are able to  
71 do this belong to the Sacoglossan clade (Rumpho *et al.*, 2011; de Vries *et al.*, 2014). These  
72 slugs are categorized based on their plastid retention times, i.e. no retention, short-term  
73 retention (hours to ~10 days) and long-term retention species ( $\geq 10$  days to several months)  
74 (Händeler *et al.*, 2009). The record holding slug *Elysia chlorotica* can retain plastids for  
75 roughly a year (Green *et al.*, 2000). The mechanisms utilized by the slugs to selectively  
76 sequester plastids from their prey algae remain uncertain, although recent studies have shown  
77 that in *E. chlorotica* it is an active process reminiscent of that observed for symbiotic algae and  
78 corals (Chan *et al.*, 2018). The slugs possibly rely on scavenger receptors and thrombospondin-  
79 type-1 repeat proteins for plastid recognition (Clavijo *et al.*, 2020).

80 The sacoglossan's ability to sequester plastids tends to distract attention from the unique  
81 features of the sequestered organelle, forming the second component of a photosynthetic slug  
82 system. Long-term retention sea slugs are only able to maintain functional plastids from a  
83 restricted list of siphonaceous algae and usually from only one species. Some sacoglossa have  
84 a wide selection of prey algae, but long-term retention of plastids is still limited to specific  
85 algal sources (Christa *et al.*, 2013; de Vries *et al.*, 2013). The native robustness of some plastid  
86 types was noticed decades ago, and early on suggested to contribute to their functionality inside

87 animals (Giles and Sarafis, 1972; Trench *et al.*, 1973 *a, b*). Studies focusing on the specific  
88 properties of the algal plastids, however, are scarce. Reduction of the plastid genome  
89 (plastome) during evolution has stripped the organelle of many genes required for self-  
90 maintenance (Martin, 2003), but genomic analysis of algal plastomes suggests that three genes  
91 (*tufA*, *ftsH* and *psbA*) could be among those critical for plastid maintenance inside a slug cell  
92 (de Vries *et al.*, 2013). Out of the three, *psbA* remains in all plastomes, including those of higher  
93 plants, whereas *tufA* and *ftsH* are encoded by most algal plastid genomes (Baldauf and Palmer,  
94 1990; Oudot-Le Secq *et al.*, 2007; de Vries *et al.*, 2013). It has been suggested that the plastid-  
95 encoded translation elongation factor EF-Tu (*tufA*) helps maintain translation, specifically of  
96 the thylakoid maintenance protease FtsH (*ftsH*) involved in the repair cycle of Photosystem II  
97 (PSII) (de Vries *et al.*, 2013). FtsH degrades the D1 protein (*psbA*) of damaged PSII before the  
98 insertion of *de novo* synthesized D1 into PSII (Mulo *et al.*, 2012; Järvi *et al.*, 2015). Without  
99 continuous replacement of the D1 protein, light-induced damage to PSII would rapidly curtail  
100 photosynthesis (Tyystjärvi and Aro, 1996).

101 Unlike all other known plastid sources of long-term retention slugs, *Vaucheria litorea* (Fig. 1),  
102 the sole prey of *E. chlorotica*, is not a green but a yellow-green alga, with plastids derived from  
103 red algal lineage through secondary endosymbiosis (Cruz *et al.*, 2013) (Fig. 1B). The plastome  
104 of *V. litorea* possesses the three important genes (de Vries *et al.*, 2013). Furthermore, the  
105 plastid-encoded FtsH of *V. litorea* has been shown to carry the critical metalloprotease domain  
106 that is not present in *ftsH* of other prey algae of long-term retention slugs (Christa *et al.*, 2018).  
107 Here, we show that isolated plastids of *V. litorea* (Fig. 1C) maintain highly specific  
108 transcription of their genes, and exhibit adequate genetic autonomy in their capability to  
109 recover from light induced damage of PSII, i.e. photoinhibition. We also estimated reactive  
110 oxygen species (ROS) production in the thylakoid membranes of *V. litorea*. While our results  
111 highlight the importance of terminal electron acceptors downstream of Photosystem I (PSI) in  
112 limiting ROS production, we show that PSII of *V. litorea* is fine-tuned to decrease the yield of  
113 the highly reactive singlet oxygen ( $^1\text{O}_2$ ). The consequences of our findings to light-induced  
114 damage and longevity of the plastids inside photosynthetic sea slugs are discussed in detail.

115

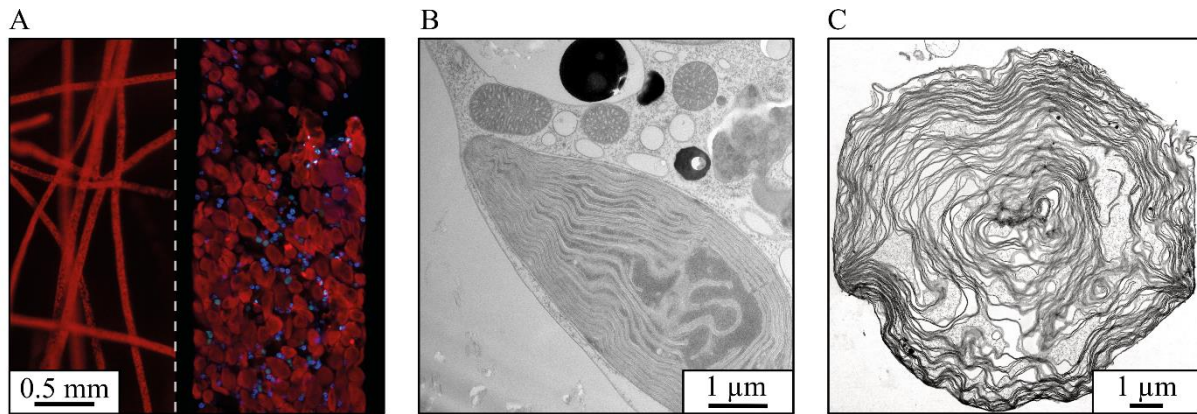

116

117 **Figure 1. Microscope images of *V. litorea*, the main source of plastids for the**  
118 **photosynthetic sea slug *E. chlorotica*.** (A) Chlorophyll autofluorescence (red) and nucleus  
119 specific dye fluorescence (blue) from *V. litorea* filaments, with a detail of a single filament on  
120 the right. (B) Transmission electron micrograph (TEM) showing a plastid *in vivo* in a *V. litorea*  
121 cell and in close proximity to several mitochondria, and in (C) an isolated single plastid.

122

## 123 Materials and Methods

### 124 Organisms and culture conditions

125 Spinach, *Spinacia oleracea* L. Matador (Nelson Garden, Tingsryd, Sweden), and *V. litorea* C.  
126 Agardh 1823 (SCCAP K-0379) were grown in SGC 120 growth chambers (Weiss Technik UK,  
127 Loughborough, United Kingdom) in 8/12 h and 12/12 h light/dark cycles, respectively. Growth  
128 light (Master TL-D 36W/840; Philips, Amsterdam, The Netherlands) photosynthetic photon  
129 flux density (PPFD) was set to  $40 \mu\text{mol m}^{-2}\text{s}^{-1}$  for both species. Temperature was maintained  
130 at 22 °C for spinach and 17 °C for *V. litorea*. Spinach plants used in the experiments were  
131 approximately 2 months old. *V. litorea* was grown in 500 ml flasks in f/2 culture medium  
132 (modified from Guillard and Ryther, 1962) made in 1% (m/v) artificial sea water (Sea Salt  
133 Classic, Tropic Marin, Wartenberg, Germany). *V. litorea* cultures were routinely refreshed by  
134 separating 1-4 g of inoculate into new flasks, and cultures used in the experiments were 1-2  
135 weeks old. Nuclei of *V. litorea* were stained for microscopy with Hoechst 33342 (Thermo  
136 Scientific, Waltham, MA, USA) using standard protocols. *In vivo* transmission electron  
137 microscope (TEM) images were taken after freeze-etch fixation. The sea slug *Elysia timida*  
138 and its prey alga *Acetabularia acetabulum* were routinely maintained as described earlier  
139 (Schmitt *et al.*, 2014; Havurinne and Tyystjärvi, 2020).

## 140 Gene expression of isolated *V. litorea* plastids

141 Plastid isolation from *V. litorea* was performed based on Green *et al.* (2005). Briefly, filaments  
142 were cut to small pieces, resuspended in 40 ml of isolation buffer (see Table 1) and  
143 homogenized with ULTRA-TURRAX® (IKA, Staufen, Germany) using four short bursts at  
144 8000 rpm. The homogenate was filtered twice through a layer of Miracloth (Calbiochem,  
145 Darmstadt, Germany), centrifuged (1900 x g, 5 min) and the pellet was resuspended in 1 ml of  
146 isolation buffer. Percoll solution containing 0.25 M sucrose was diluted to a 75 and 30%  
147 solution with 1xTE buffer containing 0.25 M sucrose. The sample was layered between the two  
148 dilutions and the assemblage was centrifuged (3500 x g, 20 min) in a swing-out rotor with no  
149 deceleration. Intact plastids were collected from the interphase and washed twice by  
150 centrifugation (2200 x g, 3 min) with isolation buffer lacking BSA. All steps were carried out  
151 at 4 °C in the dark. TEM imaging of the plastids was done after fixing the samples using  
152 glutaraldehyde and cryo-fixation followed by freeze substitution.

153 Plastids were kept in isolation buffer for seven days in routine culturing conditions. RNA was  
154 isolated at different time points using Spectrum™ Plant Total RNA Kit (Sigma-Aldrich, St.  
155 Louis, MO, USA). Aliquots with 50 ng RNA were subjected to DNase treatment (Thermo  
156 Scientific), and treated aliquots amounting to 10 ng RNA were used for cDNA synthesis  
157 (iScript™ cDNA Synthesis Kit, BioRad, Hercules, CA, USA). Quantitative real-time PCR was  
158 carried out using a StepOnePlus (Applied Biosystems, Foster City, CA, USA) and reagents  
159 from BioRad. The primers used in the qPCR were designed using Primer3  
160 (<http://frodo.wi.mit.edu/primer3>); the primer sequences are listed in Supplementary Table S1  
161 at *JXB* online. Every reaction was done with technical triplicates and results were analyzed  
162 using the  $\Delta\Delta C_t$  method (Pfaffl, 2001), in which the qPCR data were double normalized to *rbcL*  
163 and time point 0 (immediately after plastid isolation).

164

### 165 **Supplementary table S1. The list of primers designed for quantitative real-time PCR** 166 **analysis of transcription in isolated *V. litorea* plastids.**

| Symbol      | Description           | Primer (5'→3')                                                |
|-------------|-----------------------|---------------------------------------------------------------|
| <i>ftsH</i> | FtsH protease subunit | for- TGATGTTGTTTTGATGATGTTGC<br>rev- ACTCCTTTTGGTATTTTAGCACCT |

|             |                                     |                                                             |
|-------------|-------------------------------------|-------------------------------------------------------------|
| <i>psaA</i> | PSI protein PsaA                    | for-TGGACTGCTATTGGTGGTTT<br>rev-CCATTCAAGTTTAGGTGCTGCT      |
| <i>psbA</i> | PSII protein D1                     | for-ATTCCCCTCACGACCCATA<br>rev- AAACAACATCATTCTGGTGCT       |
| <i>psbB</i> | PSII protein CP47                   | for-ATGGGCTGGTTCAATGGCTT<br>rev-GCTACACCCTCAAACTCCA         |
| <i>psbC</i> | PSII protein CP43                   | for-TGGTCTGGAAATGCTCGTCTT<br>rev-CAACGCCCATCCTAAAGTA        |
| <i>psbD</i> | PSII protein D2                     | for-TGGACAAAATCAAGAACGAGGT<br>rev-ACCAACCAATAAATACGAAGCGA   |
| <i>psbH</i> | PSII protein PsbH                   | for-AAAAGTTGCTCCTGGTTGGG<br>rev-ATATTTTGCCAATCAACATCTACA    |
| <i>rbcL</i> | RuBisCo large subunit               | for-CGCTCTCTCCAACGCATAA<br>rev-GGACTTCGTGGTGGTTTAGATTT      |
| <i>tufA</i> | Translation elongation factor EF-Tu | for-TATCTACCCATTCATTATCCCCTTT<br>rev-ATTCCTATTTGCCAGGTTTCAG |

167

## 168 *In vivo* photoinhibition

169 The capacity to recover from photoinhibition was tested in spinach leaves and *V. litorea* cells  
170 in the presence of cycloheximide (CHI), a cytosolic translation inhibitor. Spinach leaf petioles  
171 were submerged in water containing 1 mM CHI and incubated for 24 h in the dark. The  
172 incubation was identical for *V. litorea* cells, except that the cells were fully submerged in f/2  
173 medium supplemented with 1 mM CHI. Control samples were treated identically without CHI.  
174 The samples were then exposed to white light (PPFD 2000  $\mu\text{mol m}^{-2} \text{s}^{-1}$ ) for 60 min and  
175 subsequently put to dark and thereafter low light (PPFD 10  $\mu\text{mol m}^{-2} \text{s}^{-1}$ ) to recover for 250  
176 min. Temperature was maintained at growth temperatures of both species using a combination  
177 of a thermostated surface and fans. The petioles of spinach leaves were submerged in water (-  
178 /+ CHI) during the experiments. Cell clusters of *V. litorea* were placed on top of the

179 thermostated surface on a paper towel moistened thoroughly with f/2 medium (-/+ CHI). PSII  
180 activity was estimated by measuring the ratio of variable to maximum fluorescence ( $F_V/F_M$ )  
181 (Genty *et al.*, 1989) with PAM-2000 (Walz, Effeltrich, Germany) fluorometer. During the light  
182 treatments,  $F_V/F_M$  was measured from samples that were dark acclimated for <5 min, except  
183 for the final time point, where the samples were dark acclimated for 20 min. The light source  
184 used for all high-light treatments discussed in this study was an Artificial Sunlight Module  
185 (SLHolland, Breda, The Netherlands).

186 Membrane proteins were isolated at timepoints indicated in the figures. The same area where  
187  $F_V/F_M$  was measured (approximately 1 cm<sup>2</sup>) was cut out of the leaves/algal clusters and placed  
188 in a 1 ml Dounce tissue grinder (DWK Life Sciences, Millville, NJ, USA) filled with 0.5 ml of  
189 osmotic shock buffer (Table 1) and ground thoroughly. The homogenate was filtered through  
190 one layer of Miracloth and centrifuged (5000 x g, 5 min). The pellet containing the membrane  
191 protein fraction was resuspended in 50  $\mu$ l of thylakoid storage buffer. The samples were stored  
192 at -80 °C until use. Membrane protein samples containing 1  $\mu$ g total Chl were solubilized and  
193 separated by electrophoresis on a 10 % SDS-polyacrylamide gel using Next Gel solutions and  
194 buffers (VWR, Radnor, PA, USA). Proteins were transferred to Immobilon-P PVDF  
195 membranes (MilliporeSigma, Burlington, MA, USA). FtsH was immunodetected using  
196 antibodies raised against *Arabidopsis thaliana* FtsH5, reactive with highly homologous  
197 proteins FtsH1 and FtsH5, or FtsH2, reactive with FtsH2 and FtsH8 (Agrisera, Vännäs,  
198 Sweden). Western blots were imaged using goat anti-rabbit IgG (H+L) alkaline phosphatase  
199 conjugate (Life Technologies, Carlsbad, CA, USA) and CDP-star Chemiluminescence Reagent  
200 (Perkin-Elmer, Waltham, MA, USA). Protein bands were quantified with Fiji (Schindelin *et*  
201 *al.*, 2012).

202 Experiments with *E. timida* were performed on freshly fed individuals. Slugs were kept in the  
203 dark overnight both in the absence and presence of 10 mg/ml lincomycin in 3.7 % artificial sea  
204 water and then exposed to high light (PPFD 2000  $\mu$ mol m<sup>-2</sup> s<sup>-1</sup>) in wells of a 24 well-plate filled  
205 with artificial sea water for 40 min. Temperature was maintained at 23 °C throughout the  
206 treatment. The slugs were then put to recover overnight in low light (PPFD <20  $\mu$ mol m<sup>-2</sup> s<sup>-1</sup>)  
207 in their growth conditions.  $F_V/F_M$  was measured with PAM-2000 after a minimum 20 min dark  
208 period as described earlier (Havurinne and Tyystjärvi, 2020).



## 209 Isolation of functional thylakoids for *in vitro* experiments

210 Functional thylakoids were isolated as described earlier (Hakala *et al.*, 2005) after 24h dark  
211 incubation. One spinach leaf per isolation was ground in a mortar in thylakoid isolation buffer  
212 (Table 1). The homogenate was filtered through a layer of Miracloth and pelleted by  
213 centrifugation (5000 x g, 5 min). The pellet was resuspended in osmotic shock buffer,  
214 centrifuged (5000 x g, 5 min) and the resulting pellet was resuspended in thylakoid storage  
215 buffer. Chl concentration was determined spectrophotometrically in 90 % acetone using  
216 extinction coefficients for Chls *a* and *b* (Jeffrey and Humphrey, 1975). Thylakoid isolation  
217 from *V. litorea* was performed using the same procedure, by grinding 2-5 g of fresh cell mass  
218 per isolation. The cell mass was briefly dried between paper towels before grinding. Chl  
219 concentration from *V. litorea* thylakoids was determined in 90% acetone using coefficients for  
220 Chls *a* and *c1 + c2* (Jeffrey and Humphrey, 1975). Protein concentrations of the thylakoid  
221 suspensions were determined with DC™ Protein Assay (Bio-Rad, Hercules, CA, USA).  
222 Thylakoids used in functional experiments were kept on ice in the dark and always used within  
223 a few hours of isolation.

224

225 **Table 1. Buffer solutions used in sample preparation and measurements.**

| Identifier                 | Composition                                                                                                | Used in                                                |
|----------------------------|------------------------------------------------------------------------------------------------------------|--------------------------------------------------------|
| Plastid isolation buffer   | 0.2 % BSA, 1 mM EDTA, 50mM Hepes-KOH pH 7.6, 1 mM MgCl <sub>2</sub> , 330 mM sorbitol                      | Plastid isolation, <i>in organello</i> gene expression |
| Thylakoid isolation buffer | 1 % BSA, 1 mM EDTA, 1 mM glycine betaine, 40 mM HEPES-KOH pH 7.4, 10 mM MgCl <sub>2</sub> , 0.3 M sorbitol | Thylakoid isolation                                    |
| Osmotic shock buffer       | 10 mM HEPES-KOH pH 7.4, 10 mM MgCl <sub>2</sub> , 5 mM sorbitol                                            | Thylakoid isolation                                    |
| Storage buffer             | 10 mM HEPES-KOH pH 7.4, 10 mM MgCl <sub>2</sub> , 5 mM NaCl, 500 mM sorbitol                               | Thylakoid isolation, EPR                               |

|                              |                                                                                                                                                                                                          |                                                                                                                 |
|------------------------------|----------------------------------------------------------------------------------------------------------------------------------------------------------------------------------------------------------|-----------------------------------------------------------------------------------------------------------------|
| Photosystem measuring buffer | 1 M glycine betaine, 40 mM HEPES-KOH pH 7.4, 1 mM KH <sub>2</sub> PO <sub>4</sub> , 5 mM MgCl <sub>2</sub> , 5 mM NaCl, 5 mM NH <sub>4</sub> Cl, 330 mM sorbitol,                                        | Thermoluminescence, flash oxygen evolution, fluorescence decay kinetics, <sup>1</sup> O <sub>2</sub> production |
| Photoinhibition buffer       | 1 M glycine betaine, 40 mM HEPES-KOH pH 7.4, 5 mM MgCl <sub>2</sub> , 5 mM NaCl, 330 mM sorbitol                                                                                                         | <i>In vitro</i> photoinhibition treatments, <i>in vitro</i> P <sub>700</sub> <sup>+</sup> measurements          |
| PSI measuring buffer         | Photosystem measuring buffer + 0.3 mM 2,6-dichlorophenolindophenol (DCPIP), 0.01 mM 3-(3,4-dichlorophenyl)-1,1-dimethylurea (DCMU), 0.12 mM methyl viologen, 32 mM Na-ascorbate, 0.6 mM NaN <sub>3</sub> | Polarographic PSI activity measurements (oxygen consumption)                                                    |
| PSII measuring buffer        | Photosystem measuring buffer + 0.5 mM 2,6-dichloro-1,4-benzoquinone (DCBQ), 0.5 mM hexacyanoferrate(III)                                                                                                 | Polarographic PSII activity measurements (oxygen evolution)                                                     |

226

## 227 Photosystem stoichiometry

228 Photosystem stoichiometry was measured from thylakoid membranes with an EPR  
 229 spectroscope Miniscope MS5000 (Magnettech GmbH, Berlin, Germany) as described earlier  
 230 (Tiwari *et al.*, 2016; Nikkanen *et al.*, 2019). EPR spectra originating from oxidized tyrosine-D  
 231 residue of PSII (Tyr<sub>D</sub><sup>+</sup>) and reaction center Chl of PSI (P<sub>700</sub><sup>+</sup>) of concentrated thylakoid samples  
 232 (2000 µg Chl ml<sup>-1</sup> in storage buffer) were measured in a magnetic field ranging from 328.96 to  
 233 343.96 mT during illumination (PPFD 4000 µmol m<sup>-2</sup> s<sup>-1</sup>) (Lightningcure LC8; Hamamatsu  
 234 Photonics, Hamamatsu City, Japan) and after a subsequent 5 min dark period in the absence  
 235 and presence of 50 µM 3-(3,4-dichlorophenyl)-1,1-dimethylurea (DCMU). The dark stable  
 236 Tyr<sub>D</sub><sup>+</sup> EPR signal (PSII signal), measured after the post illumination period in the absence of  
 237 DCMU, and the P<sub>700</sub><sup>+</sup> (PSI signal), measured during illumination in the presence of DCMU,  
 238 were double integrated to determine photosystem stoichiometry.

## 239 *In vitro* photoinhibition

240 For *in vitro* photoinhibition experiments, thylakoids were diluted to a total Chl concentration  
241 of 100  $\mu\text{g ml}^{-1}$  in photoinhibition buffer (Table 1), and 1 ml sample was loaded into a glass  
242 beaker submerged in a water bath kept at 22 °C. The samples were exposed to white light  
243 (PPFD 1000  $\mu\text{mol m}^{-2} \text{s}^{-1}$ ) and mixed with a magnet during the 60 min treatments. Aliquots  
244 were taken at set intervals to determine PSI or PSII activities using a Clark-type oxygen  
245 electrode (Hansatech Instruments, King's Lynn, England). The sample concentration in the  
246 activity measurements was 20  $\mu\text{g total Chl ml}^{-1}$  in 0.5 ml of PSI or PSII measuring buffer  
247 (Table 1). PSI activity was measured as oxygen consumption, whereas PSII activity was  
248 measured as oxygen evolution. Both activities were measured at 22 °C in strong light (PPFD  
249 3200  $\mu\text{mol m}^{-2} \text{s}^{-1}$ ) from a slide projector. The rate constant of PSII photoinhibition ( $k_{PI}$ ) was  
250 obtained by fitting the loss of oxygen evolution to a first-order reaction equation with  
251 Sigmaplot 13.0 (Systat Software, San Jose, CA, USA), followed by dark correction, i.e.  
252 subtraction of the dark inactivation rate constant from the initial  $k_{PI}$ .

253 Lipid peroxidation was measured by detecting malondialdehyde (MDA) formation (Heath and  
254 Packer, 1968). A thylakoid suspension aliquot of 0.4 ml was mixed with 1 ml of 20 %  
255 trichloroacetic acid containing 0.5 % thiobarbituric acid, incubated at 80 °C for 30 min and  
256 cooled down on ice for 5 min. Excess precipitate was pelleted by centrifugation (13500 x g, 5  
257 min), and the difference in absorbance between 532 and 600 nm ( $Abs_{532-600}$ ) was measured as  
258 an indicator of the relative amount of MDA in the samples. Protein oxidation was determined  
259 by detecting protein carbonylation with Oxyblot™ Protein Oxidation Detection Kit  
260 (MilliporeSigma, Burlington, MA, USA). Thylakoid aliquot amounting to a protein content of  
261 45  $\mu\text{g}$  was taken at set time points and 10 mM dithiothreitol was used to prevent further protein  
262 carbonylation. The samples were prepared according to the manufacturer's instructions and  
263 proteins were separated in 10 % Next Gel SDS-PAGE (VWR). Carbonylated proteins were  
264 detected with Immobilon Western Chemiluminescent HRP Substrate (MilliporeSigma).

265 The maximum oxidation of  $P_{700}$  ( $P_M$ ) was estimated in an additional experiment. Thylakoids  
266 equivalent to 25  $\mu\text{g Chl}$  in 50  $\mu\text{l}$  of photoinhibition buffer were pipetted on a Whatman filter  
267 paper (grade 597; Cytiva, Marlborough, MA, USA). The filter was placed inside the lid of a  
268 plastic Petri dish, and the bottom of the Petri dish was placed on top of the lid. Photoinhibition  
269 buffer was added to the sample from the small openings on the sides of the assemblage. The  
270 thylakoids were then illuminated with high light (PPFD 1000  $\mu\text{mol m}^{-2} \text{s}^{-1}$ ) and the temperature  
271 was maintained at 22 °C using a thermostated surface.  $F_v/F_M$  and  $P_M$  were measured using a

272 700 ms high-light pulse (PPFD 10000  $\mu\text{mol m}^{-2} \text{s}^{-1}$ ) with Dual-PAM 100 (Walz) (Schreiber,  
273 1986; Schreiber and Klughammer, 2008) at set intervals. The high-light treated samples were  
274 dark acclimated for <5 min prior to the measurements.

### 275 $^1\text{O}_2$ measurements

276  $^1\text{O}_2$  was measured from thylakoids diluted to 100  $\mu\text{g}$  total Chl  $\text{ml}^{-1}$  in 0.3 ml of photosystem  
277 measuring buffer, using the histidine method described earlier (Telfer *et al.*, 1994; Rehman *et*  
278 *al.*, 2013). Continuously stirred thylakoid samples were exposed to high light (PPFD 3200  
279  $\mu\text{mol m}^{-2} \text{s}^{-1}$ ) from a slide projector at 22 °C in the presence and absence of 20 mM histidine.  
280 Oxygen consumption was measured for 60 s using an oxygen electrode (Hansatech), and the  
281 difference in the oxygen consumption rates in the presence and absence of histidine was taken  
282 as an indicator of  $^1\text{O}_2$  production. PSII electron transfer activity ( $\text{H}_2\text{O}$  to DCBQ) in the same  
283 conditions was 124.7 (SE $\pm$ 15.4) and 128.4 (SE $\pm$ 10.7)  $\mu\text{mol O}_2 \text{mg Chl}^{-1} \text{h}^{-1}$  in spinach and *V.*  
284 *litorea* samples, respectively, containing 20  $\mu\text{g}$  Chl  $\text{ml}^{-1}$ .

### 285 PSII charge recombination measurements

286 Flash-induced oxygen evolution was recorded at room temperature using a Joliot-type bare  
287 platinum oxygen electrode (PSI, Brno, Czech Republic) (Joliot and Joliot, 1968) from  
288 thylakoids diluted in photosystem measuring buffer to 50  $\mu\text{g}$  Chl  $\text{ml}^{-1}$  and supplemented with  
289 50 mM KCl, essentially as described in Antal *et al.* (2009). 200  $\mu\text{l}$  of sample was pipetted on  
290 the electrode and kept in the dark for 10 min before the measurements. The samples were then  
291 exposed to a flash train consisting of 15 single-turnover flashes (4 ns/pulse) at one second  
292 intervals, provided by a 532 nm Nd:YAG laser (Minilite, Continuum, San Jose, CA, USA).  
293 Charge recombination within PSII was probed by exposing the samples to a preflash and  
294 different dark times between the preflash and the flash train used for recording the oxygen  
295 traces.

296 The decay of Chl *a* fluorescence yield after a 30  $\mu\text{s}$  single turnover flash (maximum PPFD  
297 100 000  $\mu\text{mol m}^{-2} \text{s}^{-1}$ ) were measured at room temperature from 1 ml samples of thylakoids  
298 using FL200/PS fluorometer (PSI). Measurement length was 120 s and 8 datapoints/decade  
299 were recorded (2 in the presence of DCMU). The first datapoint was recorded 150  $\mu\text{s}$  after the  
300 flash. Single turnover flash and measuring beam voltages were set to 100 % and 60 % of the  
301 maximum, respectively. The samples were diluted in photosystem measuring buffer to a total  
302 Chl concentration of 20  $\mu\text{g ml}^{-1}$ . A set of samples was poisoned with 20  $\mu\text{M}$  DCMU to block  
303 electron transfer at the reducing side of PSII.

304 Thermoluminescence was measured from thylakoids using a custom setup (Tyystjärvi *et al.*,  
305 2009). Thylakoids were diluted to a total Chl concentration of 100  $\mu\text{g ml}^{-1}$  in photosystem  
306 measuring buffer (Table 1) in the presence and absence of 20  $\mu\text{M}$  DCMU, and a volume of 100  
307  $\mu\text{l}$  was pipetted on a filter paper disk that was placed inside the cuvette of the measuring  
308 apparatus. The samples were dark acclimated for 5 min before the onset of cooling to  $-20\text{ }^{\circ}\text{C}$   
309 by a Peltier element (TB-127-1,0-0,8; Kryotherm, Carson City, NV, USA). The samples were  
310 then exposed to a flash ( $E = 1\text{ J}$ ) from a FX-200 Xenon lamp (EGandG, Gaithersburg, MD,  
311 USA) and heated at a rate of  $0.47\text{ }^{\circ}\text{C s}^{-1}$  up to  $60\text{ }^{\circ}\text{C}$  while simultaneously recording  
312 luminescence emission.

### 313 *In vivo* P<sub>700</sub> redox kinetics

314 Redox kinetics of P<sub>700</sub> were measured as described by Shimakava *et al.*, (2019) using Dual-  
315 PAM 100 (Walz). Spinach plants and *V. litorea* cells were kept in darkness for at least 2 h  
316 before the measurements. Anaerobic conditions were obtained using a custom cuvette  
317 described in Havurinne and Tyystjärvi (2020). For spinach leaf cutouts, the cuvette was flushed  
318 with nitrogen. A combination of glucose oxidase (8 units/ml), glucose (6 mM) and catalase  
319 (800 units/ml) in f/2 culture medium was used to create anaerobic conditions for *V. litorea*  
320 cells. All samples were treated with 15 s of far red light (PFD  $120\text{ }\mu\text{mol m}^{-2}\text{ s}^{-1}$ ) and a  
321 subsequent darkness lasting 25 s prior to firing a high-light pulse (780 ms, PPFD  $10\text{ }000\text{ }\mu\text{mol}$   
322  $\text{m}^{-2}\text{ s}^{-1}$ ).

## 323 Results

### 324 Isolated *V. litorea* plastids maintain regulated gene expression

325 Laboratory-isolated *V. litorea* plastids exhibited differentially regulated gene expression even  
326 after seven days in isolation (Fig. 2). The orientations of selected genes in *V. litorea* plastome  
327 are shown in Fig. 2A. PSII core subunit genes *psbA*, *psbB*, *psbC* and *psbD* were downregulated  
328 after day 3 of the isolation period, while *psbB* and *psbD*, encoding CP47 and D2 proteins of  
329 PSII, reached a stationary level after five days, and the transcription of the genes encoding PSII  
330 proteins CP43 (*psbC*) and D1 (*psbA*) were among those downregulated most significantly (Fig.  
331 2B). The main protein of PSII targeted for degradation after photoinhibition is D1, whereas  
332 release of CP43 from the PSII core has been suggested to precede D1 degradation in higher  
333 plants (Aro *et al.*, 2005). One gene, *psbH*, encoding a small PSII subunit involved in proper  
334 PSII assembly in cyanobacteria (Komenda *et al.*, 2005), exhibited stationary transcript levels

335 throughout the isolation period, similar to the gene encoding PSI reaction center subunit PsaA.  
336 Transcription of *ftsH* and *tufA*, encoding the maintenance protease FtsH and the translation  
337 elongation factor EF-Tu, followed an upward trajectory throughout the experiment (Fig. 2B).  
338 We also tested the genetic autonomy of plastids sequestered by *E. timida* that feeds on *A.*  
339 *acetabulum*. Subjecting the slugs to high light for 40 min resulted in a drastic decrease in PSII  
340 photochemistry ( $F_V/F_M$ ), but the kleptoplasts inside the slugs were capable of restoring PSII  
341 activity back to 78 % of the initial level during a 20 h recovery period. Subjecting the slugs to  
342 lincomycin, a plastid specific translation inhibitor (Mulo *et al.*, 2003), however, almost  
343 completely prevented the recovery (Fig. 2C).  
344

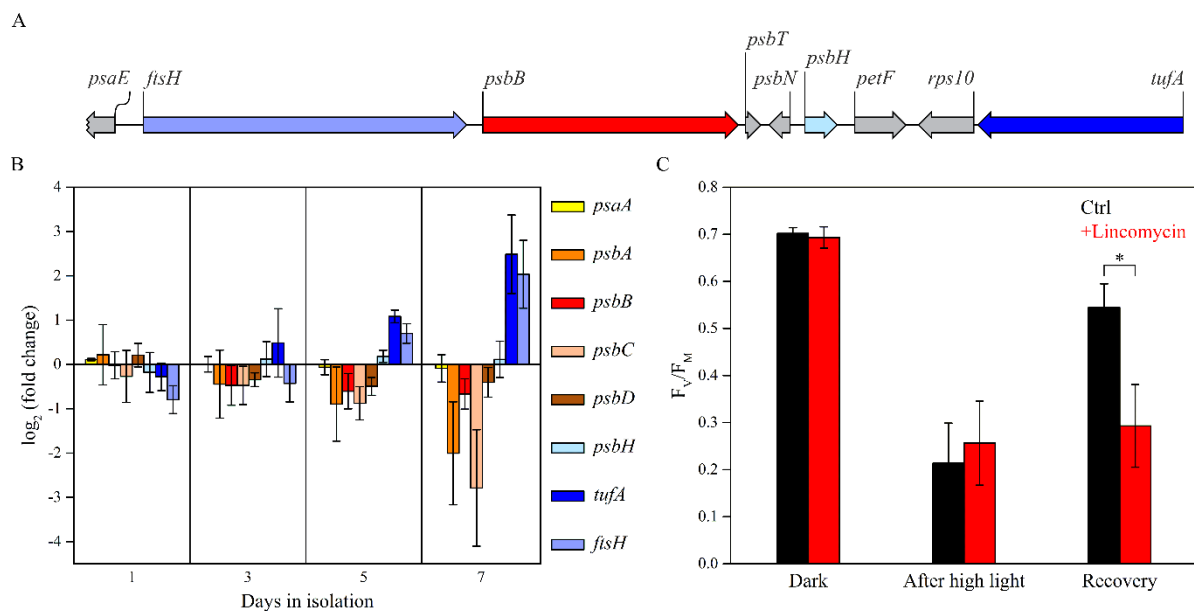

345

346 **Figure 2. Transcription of plastid encoded genes in isolated *V. litorea* plastids and the**  
347 **autonomy of kleptoplasts inside the sea slug *E. timida*.** (A) Orientation of specific genes  
348 inspected in (B) in *V. litorea* plastid genome. (B) Amounts of transcripts of selected genes  
349 during a period of seven days in isolation buffer; each transcript has been compared to the  
350 amount measured immediately after plastid isolation. (C) Maximum quantum yield of PSII  
351 photochemistry ( $F_V/F_M$ ) measured at different timepoints of the photoinhibition treatment (40  
352 min, PPF<sub>D</sub> 2000  $\mu\text{mol m}^{-2}\text{s}^{-1}$ ) and after overnight recovery (PPFD < 20  $\mu\text{mol m}^{-2}\text{s}^{-1}$ ) in *E.*  
353 *timida* slug individuals in the absence and presence of lincomycin. The data in panels (B) and  
354 (C) are averages from three and four biological replicates, respectively. Error bars indicate  
355 standard deviation. An asterisk indicates a statistically significant difference between the two  
356 groups (Welch's t-test,  $P < 0.005$ ).

357

358 **FtsH translation is enhanced in functionally isolated plastids of *V. litorea* during**  
359 **recovery from photoinhibition**

360 Treating spinach leaves with CHI, a cytosolic translation inhibitor, resulted in faster loss of  
361 PSII activity in high light (Fig. 3A). Also PSII repair was impaired by CHI in spinach. *V. litorea*  
362 showed almost no effect of CHI during the same photoinhibition and recovery treatment (Fig.  
363 3B). Using two different FtsH antibodies (FtsH 1+5 and FtsH 2+8), we tested the possible  
364 involvement of plastid-encoded FtsH of *V. litorea* in the unaffected PSII photochemistry in  
365 CHI treated samples. There were no differences in the relative protein levels of FtsH between  
366 control and CHI treated spinach during the experiment (Fig. 3C). Genes for FtsH reside in the  
367 nucleus in spinach, and our results suggest that the CHI treatment did not inhibit cytosolic  
368 translation in the leaves entirely, although *de novo* synthesis of proteins could not be tested by  
369 radiolabeling experiments. In *V. litorea*, CHI treatment increased FtsH levels towards the end  
370 of the experiment (Fig. 3D). This suggests that not only is expression of plastome genes active  
371 in functionally isolated plastids of *V. litorea*, but the translation of specific genes such as *ftsH*  
372 can be upregulated when the plastids are deprived from normal cytosolic governance.

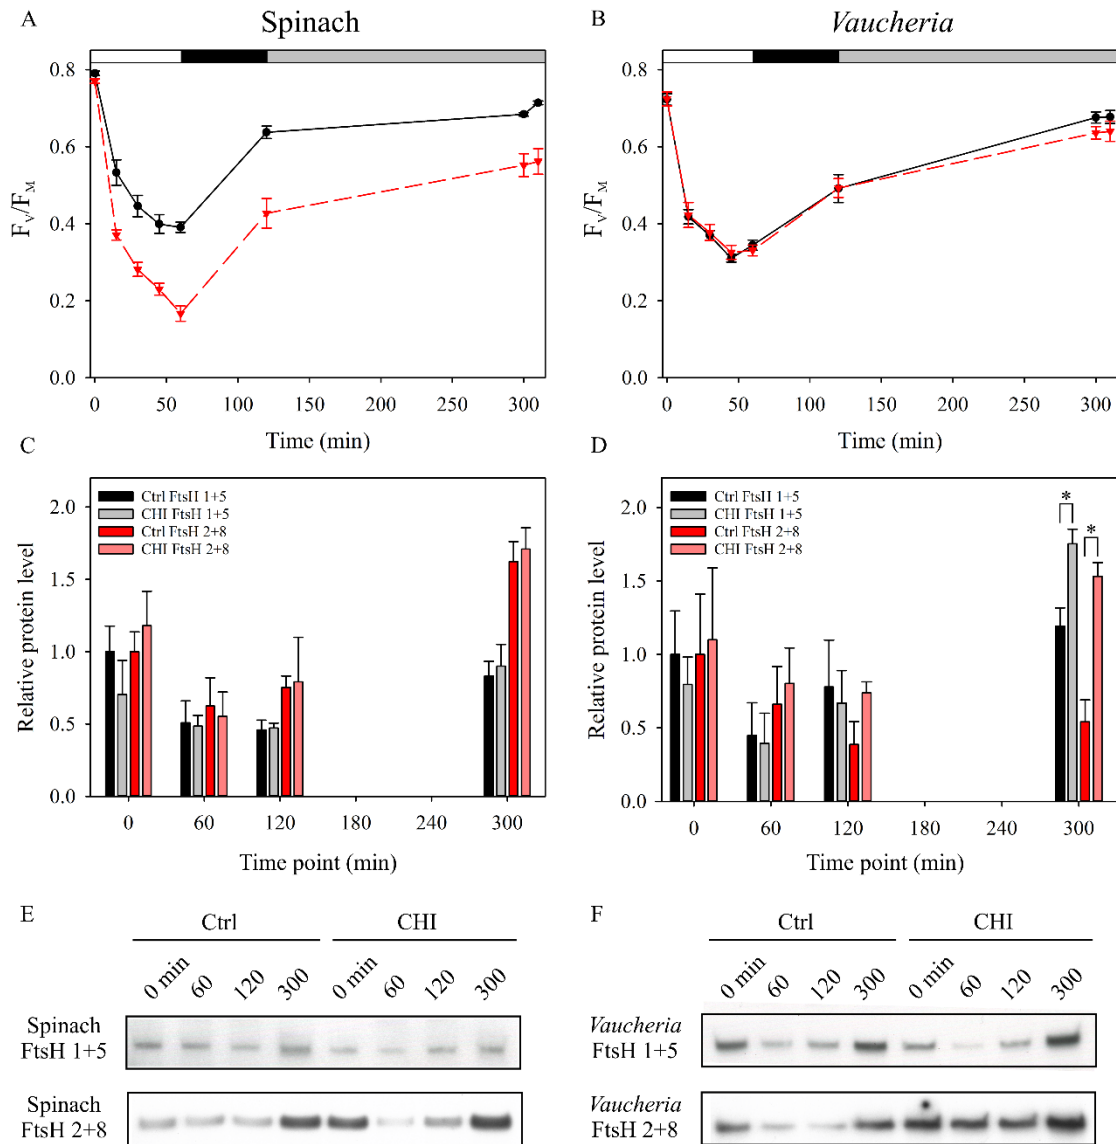

373

374 **Figure 3. *V. litorea* recovers from photoinhibition of PSII in the presence of**  
 375 **cycloheximide, a cytosolic translation inhibitor, and exhibits upregulation of FtsH.**

376 Quantum yield of PSII photochemistry ( $F_v/F_m$ ) during photoinhibition treatment and  
 377 subsequent recovery of (A) spinach and (B) *V. litorea* in the absence (ctrl; black) and presence  
 378 of CHI (red). 0 min timepoint was measured before the onset of high-light treatment, 60 min  
 379 timepoint after the high-light treatment ( $PPFD\ 2000\ \mu\text{mol}\ \text{m}^{-2}\text{s}^{-1}$ ), 120 min timepoint after  
 380 subsequent dark recovery, and 300 min timepoint after recovery in dim light ( $10\ \mu\text{mol}\ \text{m}^{-2}\text{s}^{-1}$ ).  
 381 The final timepoint at 310 min was measured after additional 10 min dark acclimation. The  
 382 white, black and gray bars on top indicate the high-light treatment, dark and dim light periods,  
 383 respectively. (C) Relative levels of FtsH in spinach and (D) *V. litorea* during the experiment,  
 384 as probed by antibodies raised against *A. thaliana* FtsH 5 (FtsH 1+5; black and grey bars for  
 385 ctrl and CHI treatments, respectively) and FtsH 2 (FtsH 2+8; red and light red bars for ctrl and



386 CHI treatments). The light treatment regime up to 300 min was the same as in (A) and (B).  
387 Significant differences between treatments are indicated by an asterisk (Welch's t-test,  $P < 0.05$ ,  
388  $n=3$ ). (E, F) Representative FtsH Western blots from spinach and *V. litorea*, respectively, used  
389 for protein quantification in panels (C) and (D). All data in (A) to (D) represent averages from  
390 at least three independent biological replicates and the error bars represent SE.

### 391 Thylakoids of *V. litorea* exhibit moderate photoinhibition of PSII and elevated 392 ROS damage, but produce little $^1\text{O}_2$

393 Basic photosynthetic parameters of isolated thylakoids from spinach and *V. litorea* are shown  
394 in Table 2. Photoinhibition of PSII during a 60 min high-light treatment of isolated thylakoids  
395 proceeded according to first-order reaction kinetics (Tyystjärvi and Aro, 1996) in both species  
396 (Fig. 4A). However, spinach thylakoids were more susceptible to damage, as indicated by the  
397 larger rate constant of dark-corrected PSII photoinhibition ( $k_{PI}$ ) (Table 2). General oxidative  
398 stress assays of lipids and proteins of the thylakoid membranes exposed to high light showed  
399 more ROS damage in *V. litorea* than in spinach thylakoids during the treatment (Fig. 4B,C).  
400 Measurements of  $^1\text{O}_2$  production, the main ROS produced by PSII (Krieger-Liszkay, 2005;  
401 Pospíšil, 2012), from isolated thylakoids showed that the rate of  $^1\text{O}_2$  production in *V. litorea* is  
402 only half of that witnessed for spinach (Fig. 5A). This suggests that the main ROS, causing the  
403 *in vitro* oxidative damage to lipids and proteins (Fig. 4B,C) in *V. litorea*, are partially reduced  
404 oxygen species produced by PSI.

405

406 **Table 2. Photosynthesis-related parameters of isolated spinach and *V. litorea* thylakoid**  
407 **membranes.** The EPR spectra used for estimating the PSI/PSII ratio are shown in  
408 Supplementary Fig. S1. The indicated PSII and PSI activities are averages from all initial  
409 activity measurements of untreated control samples discussed in this publication. The  $k_{PI}$  value  
410 was determined from first-order reaction fits of the photoinhibition data in Fig. 4A, and  
411 corrected by subtracting the first-order rate constant of PSII inhibition in the dark  
412 (Supplementary Fig. S2). All values are averages from a minimum of three biological replicates  
413 and SE is indicated in parentheses.

| Organism | PSI/PSII | PSII activity<br>(H <sub>2</sub> O to | PSI activity<br>(DCPIP to methyl | $k_{PI}$ (min <sup>-1</sup> ) |
|----------|----------|---------------------------------------|----------------------------------|-------------------------------|
|          |          |                                       |                                  |                               |

|                   |                          | DCBQ;<br>$\mu\text{mol O}_2$<br>evolved mg<br>Chl <sup>-1</sup> h <sup>-1</sup> ) | viologen;<br>$\mu\text{mol O}_2$<br>consumed mg<br>Chl <sup>-1</sup> h <sup>-1</sup> ) |                           |
|-------------------|--------------------------|-----------------------------------------------------------------------------------|----------------------------------------------------------------------------------------|---------------------------|
| Spinach           | 2.438<br>( $\pm 0.100$ ) | 200.12<br>( $\pm 11.53$ )                                                         | 758.22<br>( $\pm 77.14$ )                                                              | 0.0289<br>( $\pm 0.002$ ) |
| <i>V. litorea</i> | 2.343<br>( $\pm 0.090$ ) | 244.54<br>( $\pm 15.71$ )                                                         | 797.36<br>( $\pm 93.73$ )                                                              | 0.0148<br>( $\pm 0.001$ ) |

414

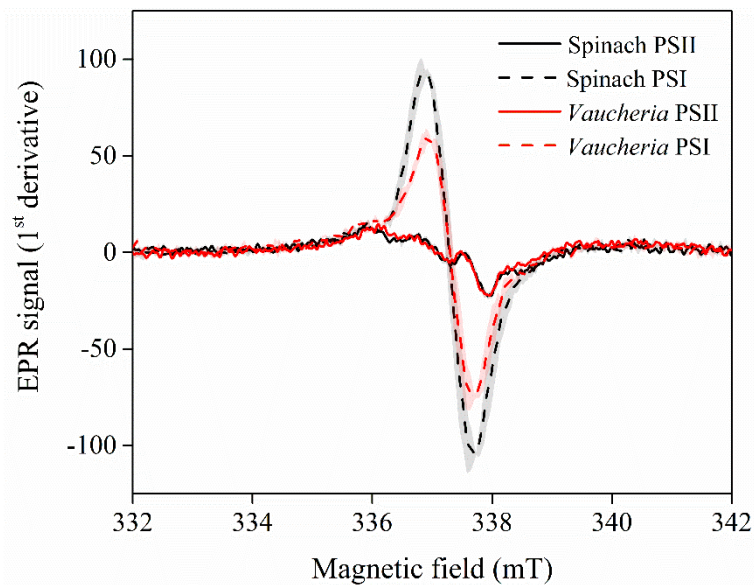

415

416 **Supplementary Figure S1. EPR spectra of PSII (Tyr<sub>D</sub><sup>+</sup>) and PSI (P<sub>700</sub><sup>+</sup>) in spinach and *V.***  
417 ***litorea* thylakoids.** All spectra were measured from isolated thylakoid samples containing 2000  
418  $\mu\text{g}$  total Chl ml<sup>-1</sup>. Each curve represents an average of three independent biological replicates  
419 and the shaded areas around the curves represent SE.

A

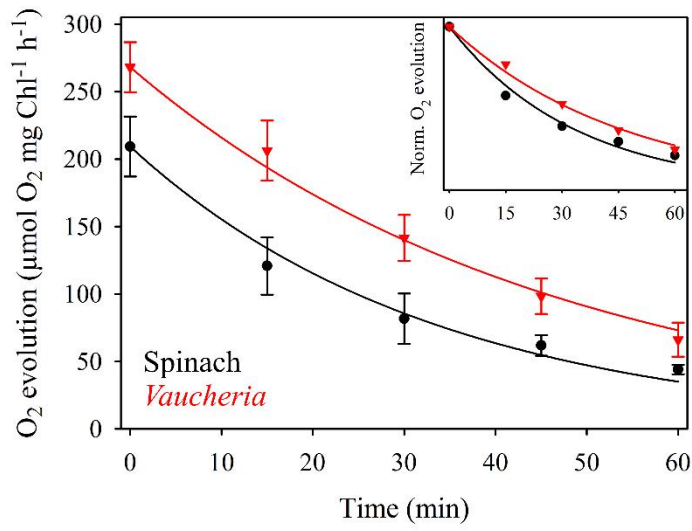

B

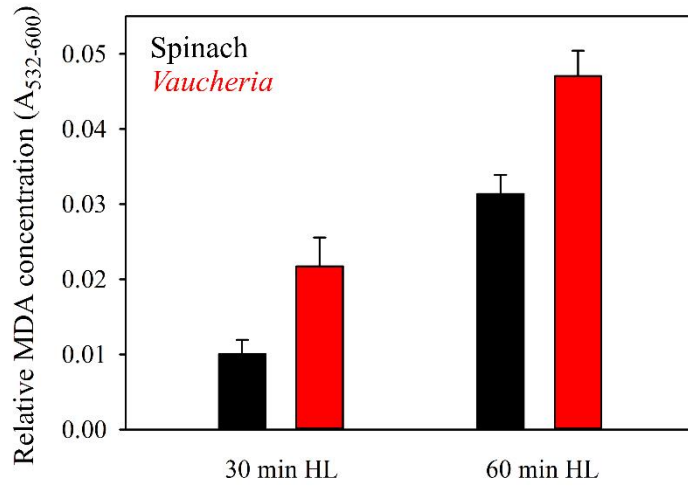

C

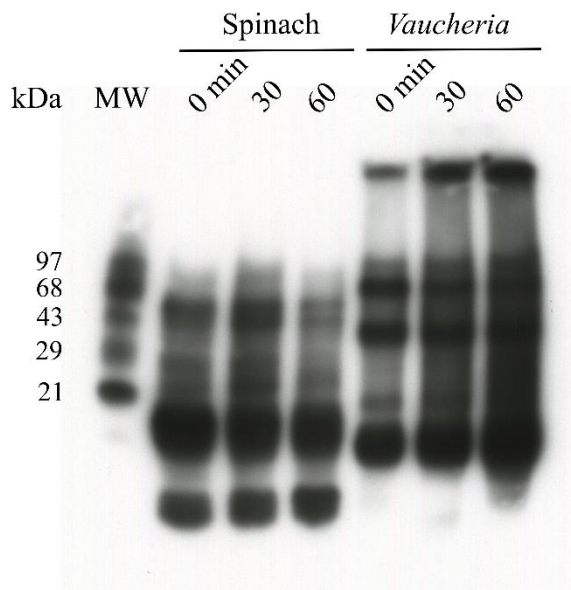

421 **Figure 4. *In vitro* photoinhibition of PSII and ROS production in spinach (black) and *V.***  
422 ***litorea* (red) thylakoids in high light.** (A) Photoinhibition of PSII in high light (PPFD 1000  
423  $\mu\text{mol m}^{-2}\text{s}^{-1}$ ), as estimated by oxygen evolution. The curves show the best fit to a first order  
424 reaction in spinach and *V. litorea*. Data normalized to the initial oxygen evolution rates are  
425 shown in the inset to facilitate comparison. Dark control experiments, shown in supplementary  
426 Fig. S2, indicated a 4.9 % (SE $\pm$ 3.6, n=3) and 27.5 % (SE $\pm$ 6.7, n=3) loss of PSII activity after  
427 60 min in the dark for spinach and *V. litorea*, respectively. (B) Lipid peroxidation after 30 and  
428 60 min of high-light treatment in spinach and *V. litorea*, as indicated by MDA formation. MDA  
429 formed during dark control treatments were subtracted from the high-light treatment data. (C)  
430 A representative Oxyblot™ assay of protein carbonylation during the high-light treatment.  
431 Each data point in panels (A, B) represents an average from a minimum of three biological  
432 replicates and the error bars indicate SE.

433

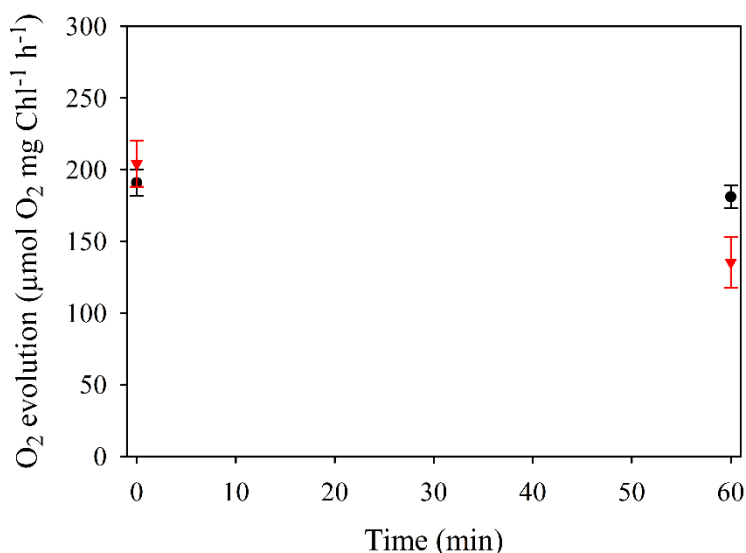

434

435 **Supplementary Figure S2. Dark control treatments of the *in vitro* photoinhibition**  
436 **experiments shown in Fig. 4A of the main text.** PSII activities of spinach (black) and *V.*  
437 *litorea* (red) at the onset and after a 60 min dark treatment at 22 °C in photoinhibition buffer.  
438 Oxygen evolution was measured in the presence of 0.5 mM DCBQ and hexacyanoferrate(III)  
439 from samples containing 20  $\mu\text{g}$  total Chl  $\text{ml}^{-1}$ . Rate constant of PSII dark inactivation was 0.001  
440  $\text{min}^{-1}$  for spinach and 0.007  $\text{min}^{-1}$  for *V. litorea*. Each data point represents an average of three  
441 biological replicates and the error bars indicate SE.

442

443 *V. litorea* produces only little  $^1\text{O}_2$ , likely due to slow PSII charge recombination

444 We probed charge recombination reactions within PSII using three different methods to  
445 investigate the role of PSII in the low  $^1\text{O}_2$  yield in *V. litorea* thylakoids (Fig. 5A). First, we  
446 measured flash-induced oxygen evolution from isolated thylakoids of spinach and *V. litorea*.  
447 After 10 min dark acclimation, thylakoids from both species exhibited a typical pattern of  
448 oxygen evolution, i.e. the third flash caused the highest oxygen yield due to the predominance  
449 of the dark-stable  $S_1$  state of the oxygen evolving complex (OEC), after which the oxygen yield  
450 oscillated with a period of four until dampening due to misses and charge recombination  
451 reactions (Fig. 5B, top curves). A single turnover pre-flash treatment makes  $S_2$  the predominant  
452 state. A 10 s dark period after the pre-flash treatment was not long enough to cause noticeable  
453 changes in the S-state distribution in either species, as can be seen from the middle curves of  
454 Fig. 5B, where the second flash of the flash train causes the highest yield of oxygen. In spinach,  
455 100 s darkness after the pre-flash treatment resulted in nearly complete restoration of the  
456 original S-states, whereas in *V. litorea* the second flash still yielded a considerable amount of  
457 oxygen (Fig. 5B, bottom curves). This is likely due to slow charge recombination between  $Q_B^-$   
458 and the  $S_2$  state of the OEC in *V. litorea* (Pham *et al.*, 2019). The modeled percentage S-state  
459 distributions of OEC from spinach and *V. litorea* after different dark times between the pre-  
460 flash and the flash train are shown in Supplementary table S2.

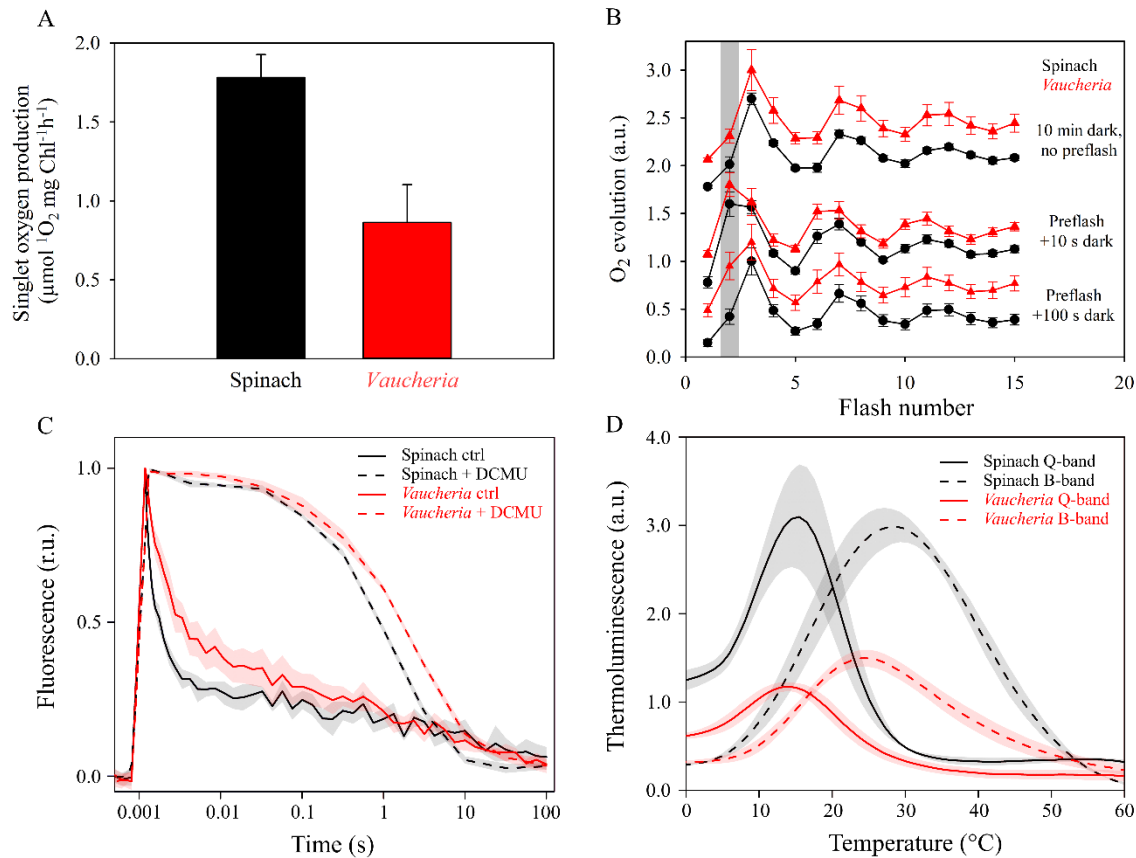

461

462 **Figure 5. *V. litorea* thylakoids produce little  $^1\text{O}_2$  and exhibit slow charge recombination**

463 **of PSII. (A)  $^1\text{O}_2$  production in spinach (black) and *V. litorea* (red) thylakoid membranes. (B)**

464 **Flash oxygen evolution after different preflash treatments in spinach and *V. litorea* thylakoids.**

465 **The grey bar highlights the oxygen yield instigated by the second flash, an indicator of charge**

466 **recombination reactions taking place during the dark period between a preflash and the**

467 **measuring flash sequence. Oxygen traces were double normalized to the first (zero level) and**

468 **third flash and shifted in Y-axis direction for clarity. (C) Chl fluorescence decay kinetics after**

469 **a single turnover light pulse in untreated (solid lines) and DCMU poisoned (dashed lines)**

470 **thylakoids, double normalized to zero level before the onset of the pulse and maximum**

471 **fluorescence measured 150  $\mu\text{s}$  after the pulse. (D) Q (solid lines) and B band (dashed lines) of**

472 **thermoluminescence, measured in the presence and absence of DCMU, respectively. All data**

473 **in (A-C) represent averages from at least three biological replicates. Thermoluminescence data**

474 **in (D) are from three replicates obtained from pooled thylakoid batches isolated from three**

475 **plants/algae flasks. Error bars and shaded areas around the curves show SE.**

476

477 **Supplementary table S2. Percentage distribution of the S-states of the OEC in isolated**  
 478 **thylakoids from spinach and *V. litorea* after different preflash treatments prior to**  
 479 **measuring flash induced oxygen evolution.** The flash oxygen data in Figure 5B was modeled  
 480 essentially as described in Antal *et al.*, (2009) to estimate the S-state distribution.

|                                        | S <sub>0</sub> % (±SE) | S <sub>1</sub> % (±SE) | S <sub>2</sub> % (±SE) | S <sub>3</sub> % (±SE) |
|----------------------------------------|------------------------|------------------------|------------------------|------------------------|
| Spinach 10 min dark                    | 0.01 (±0.01)           | 71.01 (±2.78)          | 24.54 (±1.95)          | 4.44 % (±1.15)         |
| Spinach preflash + 10 s dark           | 0                      | 32.30 (±9.36)          | 57.28 (±5.83)          | 10.42 (±3.63)          |
| Spinach preflash + 100 s dark          | 0                      | 65.30 (±0.17)          | 26.32 (±0.07)          | 8.39 (±0.24)           |
| <i>Vaucheria</i> 10 min dark           | 6.84 (±3.20)           | 63.44 (±3.66)          | 24.65 (±3.70)          | 5.08 (±3.20)           |
| <i>Vaucheria</i> preflash + 10 s dark  | 0.02 (±0.01)           | 24.69 (±1.19)          | 60.62 (±0.59)          | 14.66(±0.83)           |
| <i>Vaucheria</i> preflash + 100 s dark | 0.01 (±0.01)           | 45.21 (±2.03)          | 39.18 (±0.92)          | 15.61 (±2.53)          |

481

482 Next, we measured the decay of Chl *a* fluorescence yield after a single turnover flash from  
 483 thylakoids in the absence and presence of the PSII electron transfer inhibitor DCMU.  
 484 Fluorescence decay in the absence of DCMU reflects Q<sub>A</sub><sup>-</sup> reoxidation mainly by electron  
 485 donation to Q<sub>B</sub> and Q<sub>B</sub><sup>-</sup>. In the presence of DCMU, fluorescence decay is indicative of Q<sub>A</sub><sup>-</sup>  
 486 reoxidation through various charge recombination reactions (Mamedov *et al.*, 2000), some of  
 487 which generate the harmful triplet P<sub>680</sub> Chl through the intermediate P<sub>680</sub><sup>+</sup>Pheo<sup>-</sup> radical pair  
 488 (Sane *et al.*, 2012). The decay of fluorescence yield was slower in *V. litorea* thylakoids than in  
 489 spinach both in the absence and presence of DCMU (Fig. 5C). In the absence of DCMU, the  
 490 slower kinetics in *V. litorea* shows that electron transfer from Q<sub>A</sub><sup>-</sup> to Q<sub>B</sub> is not as favorable as  
 491 in spinach. The slow decay of fluorescence in the presence of DCMU indicates slow S<sub>2</sub>Q<sub>A</sub><sup>-</sup>  
 492 charge recombination.

493 Thermoluminescence Q and B bands from thylakoids in the presence and absence of DCMU,  
494 respectively, were also measured. For a description on the interpretation of  
495 thermoluminescence data, see Tyystjärvi and Vass, (2004) and Sane *et al.*, (2012). Briefly, the  
496 thylakoid samples were dark acclimated for 5 min, cooled down to -20 °C, flashed with a single  
497 turnover Xenon flash and then heated with a constant rate. The luminescence emitted by the  
498 samples at different temperatures is proportional to the rate of the luminescence-producing  
499 charge recombination reactions between the S-states of the OEC and downstream electron  
500 acceptors, more specifically  $S_2/Q_A^-$  (Q band) and  $S_{2,3}/Q_B^-$  (B band). The Q and B band emission  
501 peaks in spinach were at 15 and 28 °C, whereas in *V. litorea* they were at 14 and 24 °C (Fig.  
502 5D). The lower peak temperatures in *V. litorea* would actually suggest that both  $Q_A^-$  and  $Q_B^-$   
503 are less stable at room temperature in *V. litorea* than in spinach. However, the multiple  
504 pathways of recombination (Rappaport and Lavergne, 2009) obviously allow the  
505 luminescence-producing minor pathway to suggest destabilization of  $Q_A^-$  in *V. litorea* (Fig.  
506 5D) even if the total recombination reaction is slower in *V. litorea* than in spinach (Fig. 5B,C  
507 and Supplementary table S2). The thermoluminescence signal intensity was lower in *V. litorea*  
508 than in spinach, suggesting that the luminescence-producing reaction has a low yield in *V.*  
509 *litorea*. The narrow energy gap between  $Q_A$  and  $Q_B$  in *V. litorea* favors the probability of an  
510 electron residing with  $Q_A$ . Furthermore, a small  $Q_A$ - $Q_B$  energy gap also increases the  
511 probability that  $S_3Q_B^-$  or  $S_2Q_B^-$  recombine directly and non-radiatively without producing  
512 triplet  $P_{680}$  and subsequently  $^1O_2$  (Ivanov *et al.*, 2003; Sane *et al.*, 2003; Ivanov *et al.*, 2008;  
513 Sane *et al.*, 2012).

#### 514 *In vitro* high-light treatment lowers electron donation to methyl viologen and 515 maximal oxidation of $P_{700}$ in *V. litorea*

516 When PSI activity was estimated as electron transfer from DCPIP to methyl viologen (oxygen  
517 consumption), spinach PSI remained undamaged during *in vitro* high-light treatment, while *V.*  
518 *litorea* seemed highly susceptible to photoinhibition of PSI (Fig. 6A,B). We repeated the  
519 photoinhibition experiment, but this time PSII and PSI activities were monitored with Chl  
520 fluorescence and  $P_{700}$  absorption changes. Again, thylakoid membranes of spinach were more  
521 sensitive to photoinhibition of PSII during the high-light treatment than *V. litorea* (Fig. 6C,D).  
522 However, this time PSI functionality of both species decreased similarly when estimated as the  
523 maximum oxidation of  $P_{700}$  ( $P_M$ ). The decrease in  $P_M$  was strong during the first 15 (*V. litorea*)  
524 or 30 min (spinach) of the light treatment, whereafter  $P_M$  remained at a somewhat stationary  
525 level (Fig. 6C,D). The decrease in  $P_M$  depended on electron transfer from PSII, as  $P_M$  did not



526 decrease in high light in spinach thylakoids in the presence of DCMU (Supplementary Fig.  
527 S4).

528 In both spinach and *V. litorea*, redox kinetics of  $P_{700}$ , measured in aerobic conditions from  
529 thylakoids (Fig. 6E,F) were similar as their respective *in vivo* kinetics (Fig. 6E,F insets), i.e.  
530  $P_{700}$  in *V. litorea* remained more oxidized during a light pulse than in spinach. Isolating  
531 thylakoids from *V. litorea* did, however, cause a decrease in  $P_{700}$  oxidation capacity. Unlike in  
532 spinach,  $P_{700}$  remains oxidized during a high-light pulse in intact *V. litorea* cells if oxygen is  
533 present, indicating that alternative electron sinks, such as flavodiiron proteins, function as  
534 efficient PSI electron acceptors *V. litorea* (Fig. 6E,F insets), probably protecting PSI against  
535 formation of ROS (Allahverdiyeva *et al.*, 2015; Ilík *et al.*, 2017; Shimakawa *et al.*, 2019). In  
536 both species,  $P_{700}$  redox kinetics changed in the same way during the course of the high-light  
537 treatment of isolated thylakoids. The tendency of both species to maintain  $P_{700}$  oxidized  
538 throughout the high-light pulse in measurements done after 15 min treatment in high light is  
539 possibly due to decreasing electron donation caused by photoinhibition of PSII. At 45 min  
540 timepoint the damage to PSI is more severe, as indicated by a clear slowing down of  $P_{700}$   
541 oxidation, which could be associated with problems in electron donation to downstream  
542 electron acceptors of PSI, such as ferredoxin (Fig. 6E,F).

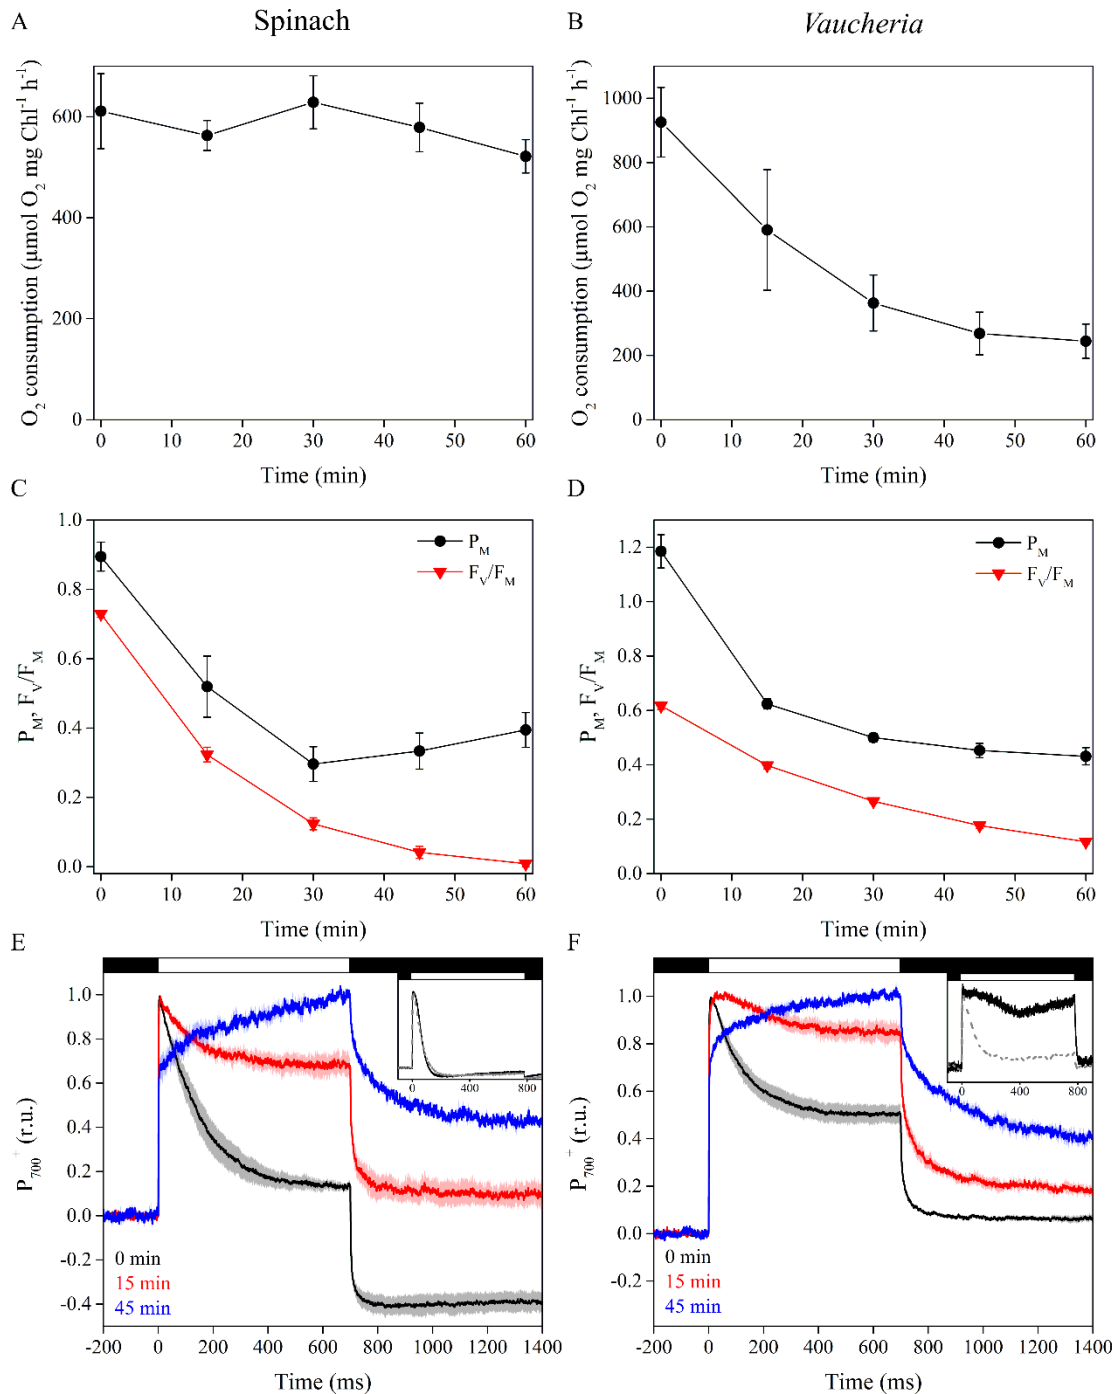

543

544 **Figure 6. Photoinhibition of PSI in isolated thylakoids of spinach and *V. litorea* during**  
 545 **high-light treatment, estimated with oxygen measurements or absorption based methods.**

546 (A, B) Photoinhibition of PSI in spinach and *V. litorea*, respectively, in the same experimental  
 547 setup as in Fig. 5. (C, D) Decrease in maximal oxidation of P<sub>700</sub> reaction center Chl (P<sub>M</sub>; black)  
 548 and PSII photochemistry (F<sub>V</sub>/F<sub>M</sub>; red) during high-light treatment (PPFD 1000 μmol m<sup>-2</sup>s<sup>-1</sup>) in  
 549 isolated spinach and *V. litorea* thylakoids. (E) P<sub>700</sub> redox kinetics of spinach thylakoids during  
 550 the high-light pulses used for P<sub>M</sub> determination after 0, 15 and 45 min in photoinhibition  
 551 treatment (black, red and blue, respectively). Black and white bars on top indicate darkness and

552 illumination by the high-light pulse, respectively. (F) The same measurements as in (E) in *V.*  
553 *litorea* thylakoids. The insets of (E, F) show  $P_{700}$  redox kinetics from intact spinach leaves and  
554 *V. litorea* cells in aerobic (black, solid line) and anaerobic conditions (grey, dashed line). Dark  
555 control experiments are shown in Supplementary figure S3. The  $P_{700}$  kinetics in (E) and (F)  
556 have been normalized to stress the form of the curve. All data are averages from at least three  
557 biological replicates and error bars and the shaded areas around the curves indicate SE.  
558

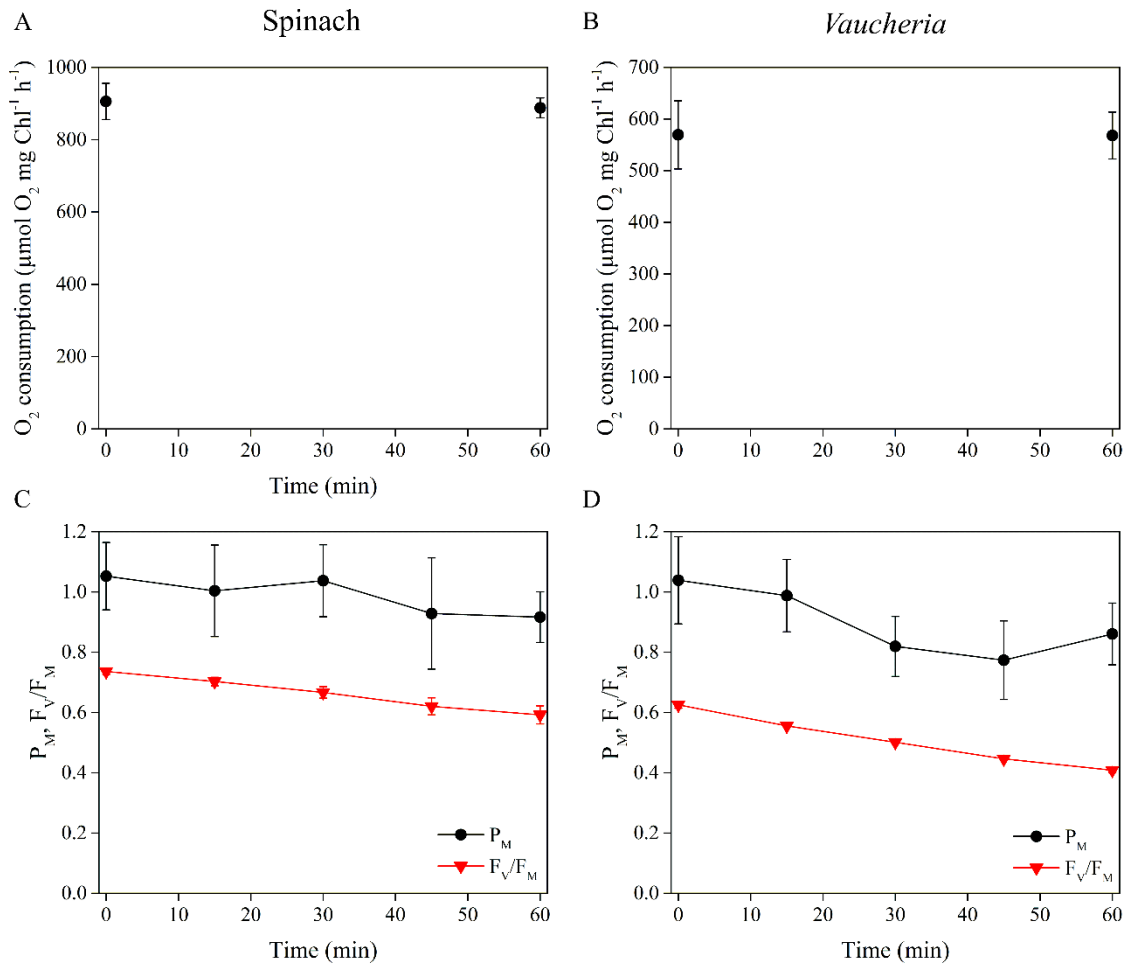

559 **Supplementary figure S3. Dark control treatments of the *in vitro* photoinhibition**  
560 **experiments shown in Fig. 6 of the main text.** (A, B) PSI activities of spinach and *V. litorea*  
561 during a 60 min dark incubation period in photoinhibition buffer, measured as oxygen  
562 consumption. (C, D) PSI and PSII activities in isolated spinach and *V. litorea* thylakoids during  
563 a 60 min dark treatment, as estimated by maximal oxidation of  $P_{700}$  ( $P_M$ ; black) and  $F_V/F_M$   
564 (red), respectively. All data are averages from a minimum of three biological replicates and  
565 error bars indicate SE.  
566

567

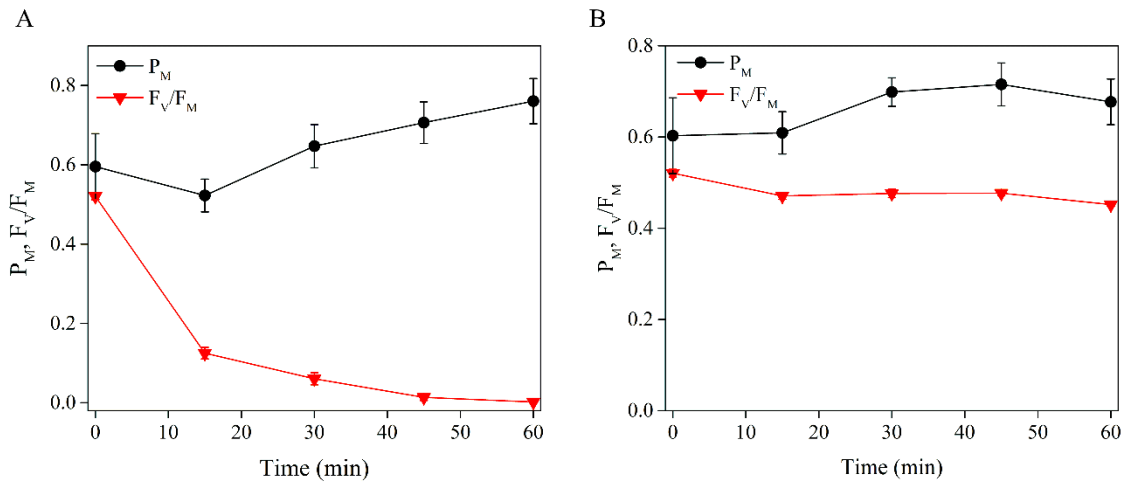

568

569 **Supplementary figure S4. DCMU prevents photoinhibition of PSI in isolated spinach**

570 **thylakoids.** (A) Maximal oxidation of  $P_{700}$  ( $P_M$ ; black) and maximum quantum yield of PSII

571 ( $F_V/F_M$ ; red) were measured during a 60 min high-light treatment (PPFD  $1000 \mu\text{mol m}^{-2}\text{s}^{-1}$ ) in

572 DCMU treated spinach thylakoids. (B) Dark control experiments using the same setup as in

573 (A). All data are averages from four biological replicates and the error bars indicate SE.

574

## 575 Discussion

### 576 Upregulation of FtsH at the center of *V. litorea* plastid longevity

577 Previous studies have shown that the kleptoplasts stemming from *V. litorea* carry out *de novo*

578 protein translation and are generally quite robust inside *E. chlorotica* (Green *et al.*, 2000;

579 Rumpho *et al.*, 2001; Green *et al.*, 2005). Our transcriptomic analysis of *V. litorea* plastids

580 demonstrates active and regulated transcription of the plastome throughout the seven days of

581 isolation we tested (Fig. 2), deepening our knowledge about the factors underpinning their

582 native robustness. Considering gene orientation of the up- and downregulated genes suggests

583 that e.g. *ftsH* and *psbB*, neighboring genes sharing the same orientation, do not constitute an

584 operon (Fig. 2A).

585 Our results highlight the upregulation of *ftsH* and *tufA* during a period of several days after

586 isolation of *V. litorea* plastids. Active transcription of these genes also occurs in the plastids of

587 *E. timida* after a month of starvation (de Vries *et al.*, 2013). FtsH protease is critical for the

588 PSII repair cycle, where it is responsible for degradation of the D1 protein after pulling it out

589 of the PSII reaction center. Recent findings in cyanobacteria, green algae and higher plants

590 imply that FtsH is also important for quality control of a multitude of thylakoid membrane

591 proteins and thylakoid membrane biogenesis (reviewed by Kato and Sakamoto, 2018). These  
592 findings may suggest that already the removal of the D1 protein from damaged PSII serves to  
593 protect from further photodamage and the production of ROS. The results of our  
594 photoinhibition experiments on the long-term retention slug *E. timida* may serve as a model of  
595 photoinhibition in other slugs, as they indicate that the kleptoplasts of *E. timida* possess a  
596 genetic toolkit capable of maintaining a PSII repair cycle (Fig. 2C).

597 We showed that the capacity of *V. litorea* plastids to recover from photoinhibition of PSII in  
598 the presence of CHI is nearly unaffected (Fig. 3B). While our CHI experiments on spinach  
599 need further exploration in terms of CHI effects, studies on the green alga *Chlamydomonas*  
600 *reinhardtii* (that also lacks *ftsH* in its plastome) have shown severe defects in PSII repair both  
601 during high-light and subsequent recovery when exposed to CHI (Fig. 3A, Wang *et al.*, 2017).  
602 *C. reinhardtii* mutant lines have also been used to show that abundant FtsH offers protection  
603 from photoinhibition of PSII and enhances the recovery process (Wang *et al.*, 2017). In *C.*  
604 *reinhardtii*, the FtsH hetero-oligomers responsible for D1 degradation are comprised of FtsH1  
605 (A-type) and FtsH2 (B-type) (Malnoë *et al.*, 2014). We probed the relative FtsH protein levels  
606 of *V. litorea* during the photoinhibition experiment using antibodies raised against *A. thaliana*  
607 A- (FtsH 1+5) and B-type FtsH (FtsH 2+8) in the absence and presence of CHI (Fig. 3D). At  
608 the end of the recovery period the CHI treated cells showed elevated levels of FtsH according  
609 to both tested antibodies. The elevated FtsH abundance did not enhance the recovery from  
610 photoinhibition of PSII in our experimental setup (Fig. 3B), but our results do point to a  
611 tendency of both, truly isolated (Fig. 2) and functionally isolated (Fig. 3) *V. litorea* plastids, to  
612 upregulate FtsH.

### 613 Low $^1\text{O}_2$ yield does not prevent photoinhibition of PSII, but can help maintain 614 efficient repair processes in *V. litorea*

615 A green alga that is nearly immune to photoinhibition of PSII, *Chlorella ohadii*, has been  
616 isolated from the desert crusts of Israel (Treves *et al.*, 2013; 2016). Its resilience against  
617 photoinhibition of PSII has largely been attributed to very narrow energetic gap between  $\text{Q}_\text{A}$   
618 and  $\text{Q}_\text{B}$ , favoring non-radiative charge recombination pathways within PSII that do not lead to  
619  $^1\text{O}_2$  production (Treves *et al.*, 2016). While *V. litorea* does not have as small energetic gap  
620 between  $\text{Q}_\text{A}$  and  $\text{Q}_\text{B}$  as *C. ohadii* (temperature difference of *V. litorea* Q- and B-band  
621 thermoluminescence peaks was 10 °C, whereas in *C. ohadii* it is only 2-4 °C), PSII charge  
622 recombination reactions of *V. litorea* appear to be very slow compared to those of spinach (Fig.

623 5B-D). Furthermore, the low  $^1\text{O}_2$  yield in *V. litorea* (Fig. 5A) suggests that the charge  
624 recombination reactions favor the direct non-radiative pathway. The low  $^1\text{O}_2$  yield in *V. litorea*  
625 likely factors into the lower dark-corrected rate constant of PSII photoinhibition in comparison  
626 to that of spinach thylakoids (Table 2) (Vass, 2011). All of our experiments, however, show  
627 that *V. litorea* does experience quite regular levels of PSII photoinhibition. This could indicate  
628 that the most important effect of the low  $^1\text{O}_2$  yield is protection of the autonomous maintenance  
629 machinery of the plastids, as  $^1\text{O}_2$  has been shown to be specifically harmful for the PSII repair  
630 cycle (Nishiyama *et al.*, 2004).

### 631 *V. litorea* thylakoids are highly vulnerable to ROS in the absence of regular 632 stromal electron sinks

633 Despite the lower rate constant of PSII photoinhibition (Table 2) and  $^1\text{O}_2$  yield (Fig. 5A), *V.*  
634 *litorea* thylakoids exhibited drastic oxidative damage to lipids and proteins under high light  
635 (Fig. 4C,D). Isolated thylakoids are stripped of the main electron sink of PSI, the Calvin-  
636 Benson-Bassham cycle, and comparing  $P_{700}$  redox kinetics of *V. litorea* cells and isolated  
637 thylakoids (Fig. 6F and inset) reveals that they are also, at least partially, devoid of a Mehler-  
638 like reaction that safely reduces oxygen to water (Allahverdiyeva *et al.*, 2013). This suggests  
639 that catalysts of oxygen reduction in *V. litorea* are likely soluble and therefore lost during the  
640 isolation procedure. Angiosperm plants like spinach do not rely on a Mehler-like reaction and  
641 are susceptible to photoinhibition of PSI in fluctuating light (Shimakawa *et al.*, 2019). The PSI  
642 photoprotection by Mehler-like reaction has been assigned to enhanced electron sink capacity  
643 that lowers the probability of one-electron reduction of oxygen to superoxide by PSI. In  
644 comparison to spinach, this would make intact plastids of *V. litorea* less reliant on other ROS  
645 detoxification components that detoxify superoxide and hydrogen peroxide in the water-water  
646 cycle (Asada, 1999). Conversely, loss of the Mehler-like reaction during thylakoid isolation  
647 would leave the thylakoids highly conducive for ROS production by PSI and very susceptible  
648 to oxidative damage of the entire photosynthetic machinery. This is likely behind the finding  
649 that *V. litorea* thylakoids lose the ability to reduce methyl viologen in a high-light treatment  
650 that does not affect spinach thylakoids (Fig. 6A,B). When damage to PSI was estimated as a  
651 decrease in  $P_M$ , spinach and *V. litorea* thylakoids showed very similar responses to high light,  
652 with both species exhibiting a decrease in PSI activity until electron donation from PSII was  
653 diminished due to photoinhibition of PSII (Fig. 6C,D), as suggested earlier (Sonoike, 1995;  
654 1996). This, in addition to the highly similar changes in the redox kinetics of  $P_{700}$  during the  
655 photoinhibition treatment (Fig. 6E,F) between the two species, would suggest that the decrease

656 in oxygen consumption in *V. litorea* thylakoids is caused by a further, more severe damage to  
657 PSI than the process causing the decrease in  $P_M$ . The nature of this reaction is not known but it  
658 may be caused by production of ROS due to continuing electron flow through PSI in thylakoids  
659 of *V. litorea* exhibiting a low rate constant of PSII photoinhibition (Table 2) and normally  
660 relying on stromal electron acceptors for protection of PSI.

661 PSI of *V. litorea* is not particularly prone to photoinhibition, but our results do confirm that the  
662 electron sinks of photosynthesis must be functional in order to avoid large scale oxidative  
663 damage. This is especially relevant for animals that host a foreign organelle where uncontrolled  
664 ROS production is detrimental (de Vries *et al.* 2015). Our recent results on the LTR slug *E.*  
665 *timida* show that oxygen functions as an alternative electron sink in the slug plastids  
666 (Havurinne and Tyystjärvi, 2020), but whether the record-holding *E. chlorotica* utilizes the  
667 oxygen dependent electron sinks provided by *V. litorea* (Fig. 6F inset) remains to be tested. As  
668 for the main electron sink of photosynthesis, the carbon fixation rates of the plastids inside *E.*  
669 *chlorotica* are comparable to the rates measured from *V. litorea* cells after incorporation  
670 (Rumpho *et al.*, 2001), suggesting that carbon fixation is not a problem in *E. chlorotica*.

## 671 Conclusion

672 Plastids of *V. litorea* are genetically more autonomous than those of embryophytes, containing  
673 genes that help to maintain plastid functionality. Isolating the plastids triggers upregulation of  
674 the translation elongation factor EF-Tu and the central maintenance protease FtsH – a  
675 phenomenon that may be important for plastid longevity in the foreign cytosol of a sea slug.  
676 Low  $^1O_2$  yield protects the functionality of the plastid-encoded maintenance machinery and  
677 may slow down photoinhibition of PSII. Interruption of oxygen dependent alternative electron  
678 sinks upstream of PSI leads to large scale oxidative damage in *V. litorea*, suggesting that carbon  
679 fixation, the main electron sink of photosynthesis, needs to remain in near perfect working  
680 order to avoid destruction of the plastids. Our results support decades old data (Trench *et al.*,  
681 1973 *a, b*) suggesting that the native stability and associated peculiar functionality of the  
682 plastids themselves hold the key to long-term kleptoplast longevity in sacoglossans. Nature has  
683 evolved an elaborate suite of photoprotective mechanisms and the unique animal-kleptoplast  
684 association allows to explore them and even identify new ones.

## 685 Supplementary data

686 Supplementary data are available at *JXB* online.

687 *Table S1.* List of primers used in qPCR experiment.

688 *Table S2.* Modeled S-state distribution of the OEC in spinach and *V. litorea*.

689 *Fig. S1.* EPR spectra from spinach and *V. litorea* thylakoids.

690 *Fig. S2.* Dark control treatments of *in vitro* PSII photoinhibition in spinach and *V. litorea*.

691 *Fig. S3.* Dark control treatments of *in vitro* PSI and PSII photoinhibition in spinach and *V.*  
692 *litorea*.

693 *Fig. S4.* *In vitro* PSI and PSII photoinhibition in DCMU treated spinach thylakoids.

## 694 Acknowledgements

695 This work was supported by Academy of Finland (grant 333421, ET). VH was supported by  
696 Finnish Cultural Foundation, Finnish Academy of Science and Letters (Vilho, Yrjö and Kalle  
697 Väisälä fund), Turku University Foundation and University of Turku Graduate School. Sofia  
698 Vesterkvist is thanked for help with *E. timida* photoinhibition measurements. SBG would like  
699 to thank the German research council for funding through the CRC 1208- 267205415 – and the  
700 SPP2237, and the group of U.-G. Maier (Marburg) for help with electron microscopy.

## 701 Author Contributions

702 VH, SBG and ET planned the experiments. VH did all photosynthesis and  $^1\text{O}_2$  measurements  
703 and wrote the paper with comments from all authors; MH, supervised by SBG, did the gene  
704 expression measurements and TEM imaging; MA measured lipid peroxidation, protein  
705 oxidation and EPR spectra; SK developed the cuvette system for  $\text{P}_{700}^+$  measurements; ET  
706 supervised the work.

## 707 Data Availability

708 The data that support the findings of this study are openly available in Mendeley Data at  
709 <http://doi.org/10.17632/535dcxjt2d.1>.

## References

**Allahverdiyeva Y, Isojärvi J, Zhang O, Aro EM.** 2015. Cyanobacterial oxygenic photosynthesis is protected by flavodiiron proteins. *Life* 5, 716-743.

**Allahverdiyeva Y, Mustila H, Ermakova M, Bersanini L, Richaud P, Ajlani G, Battchikova N, Cournac L, Aro EM.** 2013. Flavodiiron proteins Flv1 and Flv3 enable



cyanobacterial growth and photosynthesis under fluctuating light. *Proceedings of the National Academy of Sciences of the United States of America* 110, 4111–4116.

**Antal T, Sarvikas P, Tyystjärvi E.** 2009. Two-electron reactions  $S_2Q_B \rightarrow S_0Q_B$  and  $S_3Q_B \rightarrow S_1Q_B$  are involved in deactivation of higher S states of the oxygen-evolving complex of Photosystem II. *Biophysical Journal* 96, 4672-4680.

**Aro EM, Suorsa M, Rokka A, Allahverdiyeva Y, Paakkarinen V, Saleem A, Battchikova N, Rintamäki E.** 2005. Dynamics of photosystem II: a proteomic approach to thylakoid protein complexes. *Journal of Experimental Botany* 56, 347–356.

**Asada K.** 1999. The water–water cycle in chloroplasts: Scavenging of active oxygens and dissipation of excess photons. *Annual Review of Plant Physiology and Plant Molecular Biology* 50, 601–639.

**Baldauf SL, Palmer JD.** 1990. Evolutionary transfer of the chloroplast *tufA* gene to the nucleus. *Nature* 344, 262-265.

**Chan CX, Vaysberg P, Price DC, Pelletreau KN, Rumpho ME, Bhattacharya D.** 2018. Active host response to algal symbionts in the sea slug *Elysia chlorotica*. *Molecular Biology and Evolution* 35, 1706–1711.

**Christa G, Pütz L, Sickinger C, Melo Clavijo J, ELaetz EMJ, Greve C, Serôdio J.** 2018. Photoprotective non-photochemical quenching does not prevent kleptoplasts from net photoinactivation. *Frontiers in Ecology and Evolution* 6, 121.

**Christa G, Wescott L, Schäberle TF, König GM, Wägele H.** 2013. What remains after 2 months of starvation? Analysis of sequestered algae in a photosynthetic slug, *Plakobranthus ocellatus* (Sacoglossa, Opisthobranchia), by barcoding. *Planta* 237, 559–572.

**Clavijo JM, Frankenbach S, Fidalgo C, Serôdio J, Donath A, Preisfeld A, Christa G.** 2020. Identification of scavenger receptors and thrombospondin-type-1 repeat proteins potentially relevant for plastid recognition in Sacoglossa. *Ecology and Evolution* 10, 12348-12363.

**Cruz S, Calado R, Serôdio J, Cartaxana P.** 2013. Crawling leaves: photosynthesis in sacoglossan sea slugs. *Journal of Experimental Botany* 64, 3999-4009.

**de Vries J, Christa G, Gould SB.** 2014. Plastid survival in the cytosol of animal cells. *Trends in Plant Science* 19, 347-350.

**de Vries J, Habicht J, Woehle C, Huang C, Christa G, Wägele H, Nickelsen J, Martin W, Gould SB.** 2013. Is ftsH the key to plastid longevity in Sacoglossan slugs? *Genome Biology and Evolution* 5, 2540–2548.

**de Vries J, Woehle C, Christa G, Wägele H, Tielens AGM, Jahns P, Gould SB.** 2015. Comparison of sister species identifies factors underpinning plastid compatibility in green sea slugs. *Proceedings of the Royal Society B: Biological Sciences* 282, 20142519.

**Genty B, Briantais JM, Baker NR.** 1989. The relationship between quantum yield of photosynthetic electron transport and quenching of chlorophyll fluorescence. *Biochimica et Biophysica Acta* 990, 87–92.

**Giles KL, Sarafis V.** 1972. Chloroplast survival and division in vitro. *Nature New Biology* 236, 56–58.

**Green BJ, Fox TC, Rumpho ME.** 2005. Stability of isolated algal chloroplasts that participate in a unique mollusc/kleptoplast association. *Symbiosis* 40, 31–40.

**Green BJ, Li W-Y, Manhart JR, Fox TC, Summer EJ, Kennedy RA, Pierce SK, Rumpho ME.** 2000. Mollusc-algal chloroplast endosymbiosis. Photosynthesis, thylakoid protein maintenance, and chloroplast gene expression continue for many months in the absence of the algal nucleus. *Plant Physiology* 124, 331–342.

**Guillard RRL, Ryther JH.** 1962. Studies of marine planktonic diatoms. I. *Cyclotella nana* Hustedt and *Detonula confervacea* Cleve. *Canadian Journal of Microbiology* 8, 229-239.

**Hakala M, Tuominen I, Keränen M, Tyystjärvi T, Tyystjärvi E.** 2005. Evidence for the role of the oxygen-evolving manganese complex in photoinhibition of Photosystem II. *Biochimica et Biophysica Acta* 1706, 68-80.

**Händeler K, Grzybowski YP, Krug PJ, Wägele H.** 2009. Functional chloroplasts in metazoan cells - a unique evolutionary strategy in animal life. *Frontiers in Zoology* 6: 28.

**Havurinne V, Tyystjärvi E.** 2020. Photosynthetic sea slugs induce protective changes to the light reactions of the chloroplasts they steal from algae. *eLife* 9, e57389.

**Heath RL, Packer L.** 1968. Photoperoxidation in isolated chloroplasts. I. Kinetics and stoichiometry of fatty acid peroxidation. *Archives of Biochemistry and Biophysics* 125, 189-198.

**Ilík P, Pavlovič A, Kouřil R, Alboresi A, Morosinotto T, Allahverdiyeva Y, Aro EM, Yamamoto H, Shikanai T.** 2017. Alternative electron transport mediated by flavodiiron proteins is operational in organisms from cyanobacteria up to gymnosperms. *New Phytologist* 214, 967–972.

**Ivanov A, Hurry V, Sane PV, Öquist G, Huner NPA.** 2008. Reaction centre quenching of excess light energy and photoprotection of photosystem II. *Journal of Plant Biology* 51, 85–96.

**Ivanov AG, Sane PV, Hurry V, Krol M, Sveshnikov D, Huner NPA, Öquist G.** 2003. Low-temperature modulation of the redox properties of the acceptor side of photosystem II: photoprotection through reaction centre quenching of excess energy. *Physiologia Plantarum* 119, 376–383.

**Järvi S, Suorsa M, Aro EM.** 2015. Photosystem II repair in plant chloroplasts—regulation, assisting proteins and shared components with photosystem II biogenesis. *Biochimica et Biophysica Acta* 1847, 900–909.

**Jeffrey SW, Humphrey GF.** 1975. New spectrophotometric equations for determining chlorophylls *a*, *b*, *c1* and *c2* in higher plants, algae and natural phytoplankton. *Biochimie und Physiologie der Pflanzen* 167, 191-194.

**Joliot P, Joliot A.** 1968. A polarographic method for detection of oxygen production and reduction of Hill reagent by isolated chloroplasts. *Biochimica et Biophysica Acta* 153, 625-631.

**Kato Y, Sakamoto W.** 2018. FtsH protease in the thylakoid membrane: Physiological functions and the regulation of protease activity. *Frontiers in Plant Science* 9, 855.

**Komenda J, Tichý M, Eichacker LA.** 2005. The PsbH protein is associated with the inner antenna CP47 and facilitates D1 processing and incorporation into PSII in the cyanobacterium *Synechocystis* PCC 6803. *Plant and Cell Physiology* 46, 1477-83.

**Krieger-Liszkay A.** 2005. Singlet oxygen production in photosynthesis. *Journal of Experimental Botany* 56, 337-46.

**Malnoë A, Wang F, Girard-Bascou J, Wollman FA, de Vitry C.** 2014. Thylakoid FtsH protease contributes to photosystem II and cytochrome b6f remodeling in *Chlamydomonas reinhardtii* under stress conditions. *The Plant Cell* 26, 373-90.

**Mamedov F, Stefansson H, Albertsson PÅ, Styring S.** 2000. Photosystem II in different parts of the thylakoid membrane: A functional comparison between different domains. *Biochemistry* 39, 10478-10486.

**Martin W.** 2003. Gene transfer from organelles to the nucleus: frequent and in big chunks. *Proceedings of the National Academy of Sciences of the United States of America* 100, 8612-8614.

**Mulo P, Sajjaliisa P, Hou CX, Tyystjärvi T, Aro EM.** 2003. Multiple effects of antibiotics on chloroplast and nuclear gene expression. *Functional Plant Biology* 30, 1097-1103.

**Mulo P, Sakurai I, Aro EM.** 2012. Strategies for *psbA* gene expression in cyanobacteria, green algae and higher plants: from transcription to PSII repair. *Biochimica et Biophysica Acta* 1817, 247–257.

**Nikkanen L, Guinea Diaz M, Toivola J, Tiwari A, Rintamäki E.** 2019. Multilevel regulation of non-photochemical quenching and state transitions by chloroplast NADPH-dependent thioredoxin reductase. *Physiologia Plantarum* 166, 211-225.

**Nishiyama Y, Allakhverdiev SI, Murata N.** 2006. A new paradigm for the action of reactive oxygen species in the photoinhibition of photosystem II. *Biochimica et Biophysica Acta* 1757, 742-9.

**Oudot-Le Secq MP, Grimwood J, Shapiro H, Armbrust EV, Bowler C, Green BR.** 2007. Chloroplast genomes of the diatoms *Phaeodactylum tricorutum* and *Thalassiosira pseudonana*: comparison with other plastid genomes of the red lineage. *Molecular Genetics and Genomics* 277, 427-39.

**Pfaffl MW.** 2001. A new mathematical model for relative quantification in real-time RT-PCR. *Nucleic Acids Research* 29, 16-21.

**Pham LV, Olmos JDJ, Chernev P, Kargul J, Messinger J.** 2019. Unequal misses during the flash-induced advancement of photosystem II: effects of the S state and acceptor side cycles. *Photosynthesis Research* 139, 93–106.

**Pospíšil P.** 2012. Molecular mechanisms of production and scavenging of reactive oxygen species by photosystem II. *Biochimica et Biophysica Acta* 1817, 218-31.

**Rappaport F, Lavergne J.** 2009. Thermoluminescence: theory. *Photosynthesis Research* 101, 205-216.

**Rehman AU, Cser K, Sass L, Vass I.** 2013. Characterization of singlet oxygen production and its involvement in photodamage of Photosystem II in the cyanobacterium *Synechocystis* PCC 6803 by histidine-mediated chemical trapping. *Biochimica et Biophysica Acta* 1827, 689–698.

**Rumpho ME, Pelletreau KN, Moustafa A, Bhattacharya D.** 2011. The making of a photosynthetic animal. *Journal of Experimental Biology* 214, 303-311.

**Rumpho ME, Summer EJ, Green BJ, Fox TC, Manhart JR.** 2001. Mollusc/algal chloroplast symbiosis: how can isolated chloroplasts continue to function for months in the cytosol of a sea slug in the absence of an algal nucleus? *Zoology* 104, 303–312.

**Sane PV, Ivanov AG, Öquist G, Hüner NPA.** 2012. Thermoluminescence. In: Eaton-Rye JJ, Tripathy BC, Sharkey TD, eds. *Photosynthesis: Plastid Biology, Energy Conservation and Carbon Assimilation*. *Advances in Photosynthesis and Respiration* 34. Dordrecht: Springer, 445–474.

**Sane PV, Ivanov, AG, Hurry, V, Huner NPA, Öquist G.** 2003. Changes in redox potential of primary and secondary electron-accepting quinones in photosystem II confer increased resistance to photoinhibition in low temperature acclimated *Arabidopsis*. *Plant Physiology* 132, 2144–2151.

**Schindelin J, Arganda-Carreras I, Frise E, et al.** 2012. Fiji: an open-source platform for biological-image analysis. *Nature Methods* 9, 676-682.

**Schmitt V, Händeler K, Gunkel S, Escande ML, Menzel D, Gould SB, Martin WF, Wägele H.** 2014. Chloroplast incorporation and long-term photosynthetic performance through the life cycle in laboratory cultures of *Elysia timida* (Sacoglossa, Heterobranchia). *Frontiers in Zoology* 11, 5.

**Schreiber U.** 1986. Detection of rapid induction kinetics with a new type of high-frequency modulated chlorophyll fluorometer. *Photosynthesis Research* 9, 261-272.

**Schreiber U, Klughammer C.** 2008. Saturation pulse method for assessment of energy conversion in PSI. *PAM Application Notes* 1, 11-14.

**Shimakawa G, Murakami A, Niwa K, Matsuda Y, Wada A, Miyake C.** 2019. Comparative analysis of strategies to prepare electron sinks in aquatic photoautotrophs. *Photosynthesis Research* 139, 401–411.

**Sonoike K.** 1995. Selective photoinhibition of photosystem I in isolated thylakoid membranes from cucumber and spinach. *Plant and Cell Physiology* 36, 825-830.

**Sonoike K.** 1996. Degradation of *psaB* gene product, the reaction center subunit of photosystem I, is caused during photoinhibition of photosystem I: possible involvement of active oxygen species. *Plant Science* 115, 157-164.

**Telfer A, Bishop SM, Phillips D, Barber J.** 1994. Isolated photosynthetic reaction center of Photosystem II as a sensitizer for the formation of singlet oxygen. Detection and quantum yield determination using a chemical trapping technique. *Journal of Biological Chemistry* 269, 13244–13253.

**Tiwari A, Mamedov F, Grieco M, Suorsa M, Jajoo A, Styring S, Tikkanen M, Aro EM.** 2016. Photodamage of iron-sulphur clusters in photosystem I induces non-photochemical energy dissipation. *Nature Plants* 2, 16035.

**Trench RK, Boyle JE, Smith DC.** 1973 *a*. The association between chloroplasts of *Codium fragile* and the mollusc *Elysia viridis* I. Characteristics of isolated *Codium* chloroplasts. *Proceedings of the Royal Society of London. Series B, Biological Sciences* 184, 51–61.

**Trench RK, Boyle JE, Smith D.** 1973 *b*. The association between chloroplasts of *Codium fragile* and the mollusc *Elysia viridis* II. Chloroplast ultrastructure and photosynthetic carbon fixation in *E. viridis*. *Proceedings of the Royal Society of London. Series B, Biological Sciences* 184, 63–81.

**Treves H, Raanan H, Finkel OM, Berkowicz SM, Keren N, Shotland Y, Kaplan A.** 2013. A newly isolated *Chlorella* sp. from desert sand crusts exhibits a unique resistance to excess light intensity. *FEMS Microbiology Ecology* 86, 373-80.

**Treves H, Raanan H, Kedem I, Murik O, Keren N, Zer H, Berkowicz SM, Giordano M, Norici A, Shotland Y *et al.*** 2016. The mechanisms whereby the green alga *Chlorella ohadii*, isolated from desert soil crust, exhibits unparalleled photodamage resistance. *New Phytologist* 210, 1229-43.

**Tyystjärvi E, Aro EM.** 1996. The rate constant of photoinhibition, measured in lincomycin-treated leaves, is directly proportional to light intensity. *Proceedings of the National Academy of Sciences of the United States of America* 93, 2213-2218.

**Tyystjärvi E, Rantamäki S, Tyystjärvi J.** 2009. Connectivity of Photosystem II is the physical basis of retrapping in photosynthetic thermoluminescence. *Biophysical Journal* 96, 3735-3743.

**Tyystjärvi E, Vass I.** 2004. Light emission as a probe of charge separation and recombination in the photosynthetic apparatus: relation of prompt fluorescence to delayed light emission and thermoluminescence. In: Papageorgiou GC, Govindjee, eds. *Chlorophyll *a* Fluorescence: a Signature of Photosynthesis*. *Advances in Photosynthesis and Respiration* 19. Dordrecht: Springer, 363–388.

**Vass I.** 2011. Role of charge recombination processes in photodamage and photoprotection of the photosystem II complex. *Physiologia Plantarum* 142, 6–16.

**Wang F, Qi Y, Malnoë A, Choquet Y, Wollman FA, de Vitry C.** 2017. The high light response and redox control of thylakoid FtsH protease in *Chlamydomonas reinhardtii*. *Molecular Plant* 10, 99-114.
